# Supplementary material for: Empirical mode decomposition using deep learning model for financial market forecasting
Source: PeerJ Comput Sci. 2022 Sep 14;8:e1076. doi: 10.7717/peerj-cs.1076 (PMC9575866; doi:10.7717/peerj-cs.1076)
Supplement: Supplemental Information 2 [file peerj-cs-08-1076-s002.xls]

## Sheet: Figure 2 Data
data		imf1		imf2		imf3		imf4		restdue
-9.30946	0.818664	-9.57531	0.733506	-8.94024	0.575752	-9.49129	0.409786	-9.19169	0.243798	-9.23423	0.0701884
-7.34754	0.826857	-6.8818	0.727944	-4.00693	0.573721	-6.76641	0.421165	-6.12702	0.253261	-5.3203	0.0739063
-6.36625	0.832327	-5.16554	0.733396	-1.79384	0.579389	-4.38552	0.41729	-0.168255	0.270283	1.14838	0.0890073
-5.38495	0.837797	-3.20698	0.727852	0.075255	0.569803	-1.8345	0.41341	4.76599	0.272067	6.93842	0.111756
-4.405	0.837772	-1.98003	0.736063	1.60876	0.579304	0.719319	0.420978	8.67804	0.268154	15.9628	0.142056
-3.42505	0.837748	-1.0021	0.727797	4.32851	0.569697	3.77932	0.411362	13.7773	0.248948	24.1323	0.155207
-2.68874	0.843224	1.20548	0.738731	6.543	0.581089	6.16302	0.418934	18.3727	0.256465	30.2556	0.14933
-1.95176	0.851447	2.18206	0.72497	8.75142	0.567679	9.05383	0.413138	22.1193	0.271634	37.739	0.139604
-0.971812	0.851423	4.39032	0.738652	10.6257	0.579079	11.7773	0.418794	27.0516	0.265787	44.2011	0.127996
0.0108299	0.862387	5.36623	0.722144	14.5363	0.569442	13.8184	0.416835	33.0048	0.259915	52.0248	0.118262
0.993471	0.873352	6.5952	0.738597	17.0901	0.57701	16.1988	0.411052	38.6172	0.252144	59.6783	0.108531
1.97342	0.873327	8.06176	0.724824	19.4701	0.569319	18.0721	0.418637	43.0397	0.248217	67.6721	0.0987927
3.1997	0.878791	10.025	0.738511	22.5338	0.574966	20.4553	0.4243	47.8052	0.25573	74.9867	0.0947944
3.93601	0.884267	11.0016	0.72475	24.5754	0.574915	23.8551	0.412769	52.2309	0.265158	80.2608	0.0946627
4.18167	0.887008	12.7192	0.735696	26.7852	0.567228	28.6169	0.405018	55.9719	0.257434	89.6179	0.094429
4.42599	0.884255	14.4314	0.724665	30.3594	0.572863	32.1897	0.404929	60.5635	0.249688	98.296	0.0999357
4.91596	0.884243	15.6591	0.735623	33.933	0.576589	35.5955	0.418199	65.8404	0.261003
5.6516	0.886972	16.3913	0.724616	35.2922	0.568924	37.4688	0.425783	71.285	0.262775
5.65294	0.892466	17.619	0.735574	36.9954	0.576512	40.1886	0.416176	76.8983	0.258819
6.14561	0.903443	18.5962	0.724561	38.6953	0.570747	42.9078	0.404662	82.5108	0.251047
5.90331	0.914438	20.8038	0.735494	40.398	0.576428	46.6516	0.408384	88.4658	0.252806
6.63491	0.900683	22.2717	0.727216	52.4758	0.570402	49.7168	0.419754	93.5716	0.26031
7.85783	0.892411	23.9866	0.727173	54.6889	0.576071	51.7588	0.421611	97.9959	0.264015
8.3478	0.892399	25.9492	0.738113	55.8784	0.570317	56.3495	0.410049
8.83778	0.892387	27.6608	0.724334	57.9204	0.572174	60.4355	0.421394
9.3291	0.897869	30.849	0.737991	59.9625	0.574031	63.8353	0.409862
9.82109	0.906098	32.8055	0.724206	61.6624	0.568265	68.0904	0.417387
11.291	0.906062	34.0338	0.737911	64.0456	0.573929	72.3427	0.413465
12.0287	0.917032	35.0104	0.724151	67.2762	0.566217	76.4277	0.420995
12.7616	0.908772	36.2387	0.737856	70.0011	0.577596	80.8487	0.411345
13.0059	0.906019	37.2159	0.726843	72.21	0.566094	83.2287	0.403655
13.2489	0.897771	38.4436	0.737801	74.4245	0.577486	89.3585	0.424487
13.7382	0.895012	39.4201	0.72404	77.1442	0.567879	92.418	0.412964
14.2288	0.897747	40.6478	0.734999	80.0383	0.575437	94.7975	0.403366
15.4545	0.900463	41.625	0.723985	83.6087	0.565809	98.3735	0.416631
15.9458	0.905945	43.8326	0.734919	87.0145	0.579079
16.4371	0.911428	46.0355	0.726622	89.7338	0.567564
16.9284	0.91691	48.4874	0.734803	92.1185	0.578951
17.4211	0.927887	51.6695	0.723735	95.6884	0.567415
18.154	0.919627	54.8564	0.731897	98.2422	0.574983
18.8903	0.925103	57.3049	0.726341
19.383	0.936079	59.2661	0.731787
20.12	0.944303	60.4931	0.739998
20.61	0.94429	61.4704	0.728984
21.8349	0.94426	63.1866	0.734436
22.5692	0.941494	64.6545	0.726157
23.3041	0.941476	66.8614	0.734344
24.0391	0.941458	68.0843	0.726072
24.7761	0.949681	70.2912	0.734258
25.0211	0.949675	71.5135	0.723239
26.244	0.941402	72.7404	0.73145
26.9783	0.938637	74.4554	0.731407
27.9555	0.927623	75.6789	0.725882
29.4261	0.930334	77.3952	0.731334
29.4268	0.933081	78.8638	0.725803
30.4088	0.941298	80.5807	0.734001
30.6538	0.941292	82.2936	0.725717
30.8974	0.935792	84.0099	0.731169
31.3847	0.924791	85.2341	0.728391
31.6297	0.924784	86.7107	0.727896
32.8546	0.924754	87.9026	0.731682
34.0809	0.930218	88.7518	0.725937
34.5715	0.932953	90.1138	0.729719
34.5695	0.924711	90.6251	0.733522
34.5675	0.916469	91.6445	0.727773
35.5495	0.924687	92.6662	0.731563
36.2851	0.927415	93.3468	0.731546
36.5308	0.930157	94.1955	0.723893
37.2644	0.924644	95.0481	0.731503
37.9987	0.921878	95.8978	0.727667
38.2423	0.916378	97.2574	0.721909
38.4853	0.90813	98.2801	0.729515
39.2203	0.908111
39.2209	0.910859
40.2009	0.910834
40.4438	0.902586
41.6674	0.897061
44.6066	0.894241
46.0759	0.891457
49.7554	0.910596
51.2219	0.896823
52.9389	0.905022
56.8519	0.877451
60.5281	0.882854
61.2604	0.871847
63.2216	0.877292
64.9358	0.874502
67.6321	0.879929
69.8383	0.885369
71.3035	0.866101
73.2641	0.8688
74.4917	0.879758
75.469	0.868745
77.1859	0.876943
80.1237	0.868628
82.5689	0.849336
87.474	0.871192
89.6776	0.865642
92.8631	0.86831
94.3303	0.857284
95.8016	0.862742
97.0272	0.865459
98.5011	0.881906

## Sheet: Figure 4 Data
data		imf1		imf2		imf3		imf4		restdue
-9.03266	0.86492	-8.09296	0.702511	-8.59045	0.559026	-8.92211	0.409953	-9.08794	0.259019	-9.25377	0.122992
-8.4799	0.852506	-4.77638	0.702558	-6.6005	0.544147	-6.43467	0.387628	-5.60553	0.246025	-3.11809	0.117488
-8.06533	0.861829	-3.94724	0.710023	-4.61055	0.559082	-3.61558	0.383941	0.861809	0.229346	6.83166	0.104585
-7.51256	0.850967	-2.6206	0.698862	-1.79146	0.549805	-1.29397	0.411924	6.66583	0.242471	15.9523	0.0860806
-7.09799	0.863395	-1.4598	0.719375	2.5201	0.55173	1.19347	0.419413	13.1332	0.264923	24.2437	0.0731542
-6.82161	0.854082	0.530151	0.69518	6.33417	0.54433	4.34422	0.395234	17.6106	0.270576	34.3593	0.0639802
-5.99246	0.863411	1.85678	0.717559	9.65075	0.54624	8.48995	0.374795	24.0779	0.24458	44.4749	0.0603963
-5.85427	0.854096	4.01256	0.695229	12.1382	0.566772	11.9724	0.395341	33.0327	0.20744	54.093	0.0623954
-5.4397	0.866524	6.00251	0.71389	14.1281	0.55003	15.7864	0.421482	37.1784	0.214952	64.3744	0.0681306
-4.61055	0.851008	7.99246	0.697148	15.7864	0.53701	19.4347	0.404763	42.3191	0.246701	76.9774	0.0738986
-4.19598	0.8712	8.48995	0.712062	17.2789	0.557528	23.7462	0.384327	48.1231	0.27846	96.8769	0.0797696
-3.64322	0.847916	9.81658	0.697174	19.2688	0.579916	27.7261	0.3937	55.9171	0.254347
-3.50503	0.866551	11.1432	0.7121	20.9271	0.551989	31.5402	0.410524	63.3794	0.232092
-2.67588	0.854141	12.304	0.700936	23.4146	0.520347	36.1834	0.39941	67.5251	0.228424
-2.53769	0.865012	13.7965	0.714001	26.2337	0.555791	39.3342	0.388274	74.3241	0.241563
-1.98492	0.852598	16.1181	0.70099	29.2186	0.5931	43.4799	0.406966	80.6256	0.250969
-1.29397	0.863477	17.6106	0.714054	32.5352	0.581967	47.7915	0.39212	87.5905	0.245477
-0.879397	0.849508	19.2688	0.695444	34.5251	0.568952	51.7714	0.408947	97.0427	0.24561
-0.326633	0.869702	20.7613	0.727142	36.3492	0.567114	55.9171	0.384781
-0.188442	0.849517	23.0829	0.684318	38.1734	0.542916	59.897	0.412788
0.640704	0.871268	25.2387	0.732796	40.3291	0.531766	61.7211	0.42213
1.60804	0.849543	27.2286	0.682513	42.8166	0.565342	63.8769	0.405391
2.29899	0.868186	28.8869	0.69558	45.304	0.55047	67.0276	0.377485
2.85176	0.848008	29.8819	0.716091	47.7915	0.556095	70.1784	0.3943
3.95729	0.868209	31.706	0.703073	50.6106	0.544955	74.3241	0.409265
4.92462	0.852695	33.0327	0.712409	52.4347	0.558024	76.4799	0.409295
5.89196	0.866684	34.5251	0.699386	57.0779	0.53573	81.1231	0.394454
6.16834	0.848054	35.8518	0.721765	59.897	0.565583	87.4246	0.40386
7.13568	0.868254	37.8417	0.68639	64.8719	0.54702	96.8769	0.40213
7.41206	0.85273	39.3342	0.727404	67.8568	0.554515
7.96482	0.862055	40.9925	0.692024	73.9925	0.554602
8.65578	0.851195	42.3191	0.71254	76.9774	0.549054
9.20854	0.866731	43.6457	0.703242	78.9673	0.560262
10.1759	0.851216	44.6407	0.710709	80.9573	0.54911
11.2814	0.868313	45.9673	0.695821	83.2789	0.560323
11.2814	0.849679	47.6256	0.714478	87.5905	0.54175
11.5578	0.862106	49.4497	0.697734	92.2337	0.567903
12.8015	0.849701	50.7764	0.714523	97.0427	0.567971
13.4925	0.873002	52.9322	0.701509
14.1834	0.84972	54.093	0.716433
14.8744	0.873022	55.5854	0.712727
16.3945	0.849751	57.2437	0.694117
16.809	0.86218	58.902	0.710911
17.3618	0.852871	61.5553	0.703495
17.9146	0.868406	63.7111	0.709115
18.3291	0.843568	64.5402	0.701673
19.1583	0.874635	65.3693	0.712865
19.9874	0.845144	66.8618	0.703569
20.402	0.876206	68.1884	0.711042
21.093	0.846712	69.3492	0.703605
21.7839	0.876225	70.5101	0.712938
22.6131	0.843628	71.6709	0.699911
23.4422	0.876248	72.5	0.712966
24.5477	0.848314	73.8266	0.699941
24.5477	0.874711	74.8216	0.712999
25.3769	0.848325	76.3141	0.70184
25.7915	0.874729	77.9724	0.71118
26.7588	0.842134	78.9673	0.700014
27.4497	0.863883	79.9623	0.711208
27.5879	0.849909	80.9573	0.700042
28.4171	0.865449	82.7814	0.713111
28.5553	0.851476	83.9422	0.698221
28.8317	0.863902	85.6005	0.711287
29.108	0.851484	87.2588	0.700131
30.3518	0.876346	89.4146	0.715068
31.7337	0.835993	92.3995	0.696477
32.2864	0.873268	94.3894	0.713275
33.392	0.884153	97.5402	0.698412
33.6683	0.83602
34.4975	0.876405
34.6357	0.846903
35.4648	0.868654
36.0176	0.843817
36.7085	0.881094
38.0905	0.843847
38.2286	0.873352
39.0578	0.848519
39.7487	0.865609
40.7161	0.845436
41.6834	0.874953
42.9271	0.84702
43.6181	0.868769
43.8945	0.845481
44.4472	0.870334
45.2764	0.842395
45.691	0.876563
46.1055	0.845513
46.9347	0.871922
47.3492	0.842424
48.1784	0.879703
49.6985	0.851774
50.6658	0.873527
51.2186	0.844032
51.9095	0.873545
52.1859	0.839387
53.2915	0.872011
53.706	0.850278
54.397	0.872027
54.6734	0.850292
55.6407	0.862728
56.4698	0.85187
56.7462	0.868955
56.8844	0.850323
57.4372	0.87207
58.2663	0.853448
59.2337	0.873648
60.0628	0.84571
61.0302	0.875226
61.3065	0.84728
61.7211	0.869025
61.9975	0.853501
62.6884	0.862827
63.3794	0.848862
63.6558	0.867499
64.3467	0.844217
65.0377	0.875283
65.1759	0.845782
65.7286	0.867529
67.1106	0.842703
67.9397	0.876877
68.4925	0.850487
70.0126	0.864484
70.4271	0.852067
70.8417	0.862942
71.1181	0.848971
71.809	0.87072
72.3618	0.853647
73.191	0.866081
73.7437	0.855219
74.5729	0.861442
75.6784	0.863011
76.093	0.852147
77.0603	0.869241
77.1985	0.85061
77.8894	0.864595
78.5804	0.855288
79.5477	0.863065
79.9623	0.852202
80.5151	0.866185
80.9296	0.850662
81.7588	0.870861
82.8643	0.856901
84.108	0.85226
84.799	0.869351
84.9372	0.850719
86.1809	0.86937
87.0101	0.853854
87.701	0.866286
88.392	0.849215
89.3593	0.861651
90.1884	0.853899
90.603	0.863221
91.5704	0.858577
92.6759	0.852381
93.2286	0.867917
94.196	0.852403
95.7161	0.869815
97.0427	0.849337

## Sheet: Figure 6 Data
data		imf1		imf2		imf3		imf4		restdue
-8.66566	6.00665	-9.33129	4.78049	-8.42601	3.22838	-8.42601	2.02284	-2.83221	1.08625	-7.3905	0.884701
-8.27359	5.91353	-8.13483	4.85809	-6.83221	3.30599	-6.83221	2.08049	-4.24104	1.10774	19.0698	0.931264
-7.27229	6.05322	-7.94673	4.67184	-5.24104	3.33703	-5.24104	2.10177	-5.64942	1.12639	19.6899	0.915743
-6.88198	5.92905	-7.5573	4.53215	-4.64942	3.25942	-4.64942	2.12639	-4.26309	1.15743	27.4012	0.915743
-5.48068	6.1153	-7.36392	4.43902	-3.26309	3.18182	-3.26309	2.15743	-3.03109	1.17738	27.814	0.853659
-4.49612	5.96009	-6.556	4.67184	-0.673265	3.30599	-1.03109	2.17738	-1.19932	1.87805	32.6085	0.791574
-3.30054	6.02217	-5.55205	4.85809	1.11834	3.36807	3.19932	2.87805	4.58653	1.81596	33.2306	0.760532
-2.3054	6.05322	-4.96571	4.68736	2.5029	3.25942	7.58653	2.81596	9.7574	1.67627	37.1899	0.682927
-1.31819	5.94457	-4.77497	4.54767	3.88834	3.1663	11.7574	2.67627	13.5371	1.64523	38.0213	0.636364
0.476939	6.06874	-4.57982	4.48559	6.26716	3.07317	13.5371	2.64523	20.7194	1.70732	41.1463	0.626364
1.46327	5.94457	-3.18732	4.51663	8.25039	3.01109	16.7194	2.70732	24.304	1.73836	41.9787	0.636364
1.86943	6.09978	-3.37719	4.67184	10.2371	3.01109	19.304	2.73836	26.8881	1.87805	44.8963	0.605322
3.25399	5.99113	-2.57808	4.74945	12.2292	3.10421	22.8881	2.87805	28.2717	1.9867	45.936	0.605322
3.6531	6.02217	-2.1869	4.6408	13.2305	3.2439	26.2717	2.9867	30.0633	2.04878	48.8547	0.558758
5.24163	6.00665	-1.19793	4.56319	14.2327	3.39911	28.0633	2.8878	30.0518	2.07982	49.4748	0.558758
6.23677	6.03769	-0.795289	4.65632	15.2305	3.47672	30.0518	2.79823	32.6311	2.01774	52.5998	0.512195
7.0253	5.92905	-0.19662	4.70288	16.8163	3.41463	32.6311	2.77384	36.3989	1.89357	57.5998	0.512195
7.43146	6.08426	0.986623	4.54767	18.3961	3.2439	36.3989	2.89357	38.7795	1.83149	58.4293	0.481153
8.41427	5.898	1.58882	4.65632	18.9868	3.15078	38.7795	2.83149	41.953	1.73836	71.5533	0.465632
8.62352	6.08426	1.99322	4.78049	19.5793	3.08869	41.953	2.73836	44.934	1.75388	72.1812	0.419069
9.61249	6.00665	3.18703	4.81153	22.3652	3.1663	44.934	2.75388	48.9128	1.84701	75.7248	0.388027
10.2164	6.14634	3.17558	4.60976	24.359	3.29047	48.9128	2.84701	52.692	1.92461	76.3547	0.388027
11.1966	5.91353	3.56324	4.43902	25.7532	3.35255	52.692	2.92461	55.8726	1.95565	79.4787	0.356984
11.9992	6.05322	5.34955	4.40798	28.1312	3.2439	55.8726	2.95565	58.851	1.92461	80.5223	0.330421
12.7913	6.00665	6.15042	4.51663	30.5161	3.25942	58.851	2.92461	63.221	1.90909	82.6047	0.341463
13.9878	6.08426	6.35615	4.6408	31.5113	3.29047	63.221	2.90909	67.3931	1.90909	83.8585	0.330421
14.5776	5.97561	6.95746	4.73392	33.2976	3.25942	67.3931	2.90909	70.5719	1.90909	87.3973	0.313858
15.3767	6.05322	7.3601	4.82705	35.4822	3.2439	70.5719	2.90909	74.9428	1.90909	88.0262	0.3049
15.5666	5.898	8.15744	4.87361	37.4715	3.29047	74.9428	2.90909	76.7309	1.90909	90.1095	0.2949
16.7674	6.05322	8.94686	4.78049	40.0526	3.25942	76.7309	2.90909	79.3128	1.89357	94.2752	0.282816
17.1595	5.96009	9.14113	4.70288	42.0358	3.19734	79.3128	2.89357	81.2987	1.87805	99.3257	0.272516
18.3657	6.20843	10.1283	4.59424	44.0261	3.25942	81.2987	2.87805	84.8748	1.87805
19.9374	5.898	10.7182	4.48559	45.8177	3.32151	84.8748	2.87805	99.6794	1.91625
20.9361	5.99113	11.5191	4.59424	47.4071	3.32151	88.4536	2.92461
20.944	6.13082	11.7257	4.73392	48.5939	3.22838	92.0307	2.94013
22.3207	5.88248	12.1274	4.81153	50.1824	3.21286	94.813	2.95565
23.1136	5.85144	12.916	4.70288	53.9599	3.25942	97.7914	2.92461
23.5251	6.09978	12.9107	4.60976	57.7356	3.27494	98.7914	2.93461
24.5087	5.92905	13.3045	4.54767	60.125	3.36807	99.7914	2.94461
25.7114	6.1153	14.4983	4.57871	61.7152	3.38359
26.6898	5.85144	15.2983	4.67184	63.7011	3.36807
29.0827	6.00665	16.2908	4.65632	65.687	3.35255
30.0734	5.96009	17.6815	4.65632	68.0685	3.30599
31.6628	5.96009	18.8709	4.60976	71.8389	3.22838
32.4566	5.94457	19.8652	4.62528	72.434	3.21286
34.0425	5.88248	21.0625	4.7184	75.0195	3.25942
35.639	6.00665	22.4489	4.6408	77.6084	3.36807
37.0271	5.96009	23.4343	4.50111	78.9947	3.29047
38.8204	6.05322	24.0356	4.59424	81.574	3.22838
39.0129	5.94457	24.6361	4.67184	84.5576	3.29047
40.2112	6.05322	25.0369	4.73392	86.344	3.25942
41.4032	6.05322	26.4233	4.65632	89.1254	3.25942
42.5865	5.898	27.0122	4.53215	91.9078	3.27494
44.5776	5.97561	28.2078	4.59424	92.902	3.29047
44.9785	6.03769	29.0069	4.67184	95.0901	3.33703
46.5626	5.94457	29.7999	4.6408	97.6685	3.25942
47.3688	6.14634	30.5893	4.54767	99.6526	3.21286
48.3498	5.92905	31.195	4.7184
49.1542	6.09978	32.5857	4.7184
50.5379	5.97561	33.1694	4.50111
50.9379	6.02217	33.7584	4.37694
52.522	5.92905	35.55	4.43902
53.5198	6.00665	36.1575	4.6408
55.1039	5.91353	36.9619	4.81153
56.3039	6.05322	37.7619	4.90466
57.0933	5.96009	38.9477	4.79601
57.8933	6.05322	38.9372	4.60976
58.8796	5.92905	39.1288	4.48559
60.4752	6.03769	40.5134	4.37694
61.6619	5.94457	41.5164	4.54767
62.6588	6.00665	42.5177	4.68736
64.0452	5.92905	42.9204	4.78049
65.646	6.13082	44.3076	4.7184
66.4275	5.898	45.2904	4.53215
67.6284	6.05322	46.486	4.59424
69.0103	5.898	47.2877	4.7184
70.4116	6.08426	48.4762	4.65632
70.8045	6.00665	49.4599	4.48559
72.9926	6.05322	50.063	4.60976
74.7754	5.96009	50.6687	4.78049
75.1754	6.00665	51.6542	4.6408
77.3591	5.97561	52.8418	4.56319
77.9595	6.05322	54.033	4.54767
78.7463	5.91353	54.8338	4.65632
79.7449	6.00665	55.2338	4.70288
81.9286	5.97561	56.8232	4.70288
83.314	5.88248	57.0202	4.67184
84.1096	5.898	58.2052	4.54767
85.5127	6.1153	58.7985	4.50111
87.2893	5.91353	60.9893	4.59424
90.0717	5.92905	62.3835	4.65632
91.0633	5.898	63.5747	4.6408
91.8597	5.92905	64.3676	4.60976
93.4474	5.898	64.765	4.60976
94.4487	6.03769	66.357	4.65632
95.4333	5.88248	68.1469	4.68736
96.4328	5.99113	69.5367	4.67184
97.6178	5.86696	70.327	4.59424
99.0147	5.97561	70.327	4.59424
		71.9199	4.65632
		73.3116	4.67184
		73.9023	4.57871
		74.2996	4.57871
		75.497	4.67184
		76.689	4.67184
		77.482	4.6408
		79.0731	4.67184
		79.8643	4.60976
		81.6559	4.67184
		82.2467	4.57871
		83.2392	4.56319
		84.0365	4.60976
		84.4374	4.67184
		85.0272	4.56319
		85.6206	4.51663
		86.6131	4.50111
		87.2127	4.56319
		87.4158	4.6408
		88.0179	4.74945
		88.8126	4.74945
		89.4069	4.7184
		89.6029	4.67184
		90.1954	4.60976
		90.3915	4.56319
		90.9875	4.56319
		91.9818	4.57871
		92.5796	4.60976
		93.1782	4.65632
		93.5756	4.65632
		94.1707	4.6408
		94.3685	4.62528
		96.7535	4.6408
		96.9522	4.6408
		97.942	4.57871
		97.9411	4.56319
		98.9345	4.56319
		99.9332	4.65632

## Sheet: Figure 8 Data
data		imf1		imf2		imf3		imf4		restdue
-8.9593	7.03256	-7.64438	5.94186	-8.8343	4.93256	-6.69671	4.02093	-7.87016	2.73488	-7.74903	0.7
-7.70349	6.93488	-6.40019	6.03953	-8.00678	5.03023	-5.02713	3.97209	-6.20349	2.73488	-6.49903	0.7
-6.66667	7.01628	-5.55911	5.9093	-6.96318	4.99767	-2.52132	3.87442	-3.70736	2.8	8.29167	0.716279
-5.83043	6.96744	-4.31395	5.9907	-5.91279	4.85116	-1.47578	3.8093	-1.41957	2.86512	9.53779	0.781395
-4.58236	7	-2.85756	6.02326	-3.40795	4.76977	-0.221899	3.74419	2.53779	2.8814	19.9554	0.765116
-3.95543	6.96744	-2.43508	5.92558	-1.53779	4.85116	1.65504	3.71163	5.03585	2.91395	21.2025	0.813953
-1.87209	6.96744	0.0610465	5.9907	-0.915698	4.9	4.57074	3.72791	8.15891	2.94651	30.9952	0.797674
-0.619186	6.9186	0.481589	5.92558	0.32655	5.03023	7.27035	3.87442	10.032	2.97907	40.5795	0.781395
0.210271	6.98372	2.35271	5.9907	2.20446	4.9814	8.51938	3.8907	14.1977	2.99535	41.2025	0.813953
2.09012	6.90233	3.19186	5.89302	3.04457	4.86744	10.3905	3.95581	16.906	2.99535	50.5785	0.797674
2.70543	7.06512	4.64438	5.9907	4.08915	4.8186	12.6793	4.00465	18.9952	2.89767	51.407	0.87907
3.96512	6.90233	5.69186	5.89302	4.71609	4.78605	14.7636	3.98837	21.9128	2.8814	59.7432	0.830233
5.00097	7	7.56202	5.97442	7.4186	4.88372	17.686	3.8907	23.7917	2.81628	60.156	0.895349
6.68023	6.78837	7.56202	5.97442	7.62306	4.94884	18.312	3.87442	25.0417	2.81628	70.5746	0.862791
6.65988	7.13023	9.01938	5.9907	8.45155	5.03023	22.0669	3.79302	28.1686	2.78372	71.6134	0.911628
6.66957	6.96744	10.2742	5.9093	9.91957	4.86744	25.8178	3.77674	32.1298	2.73488	81.6134	0.911628
8.53973	7.04884	10.686	5.9907	10.968	4.75349	29.9835	3.79302	36.718	2.65349	94.5727	0.895349
9.38469	6.85349	11.7316	5.92558	12.8411	4.78605	33.1047	3.85814	40.4671	2.66977
10.4128	7.0814	12.9767	6.00698	14.7074	4.93256	37.687	3.87442	45.4641	2.7186
10.6298	6.93488	13.6085	5.89302	15.5359	5.01395	42.2694	3.8907	48.3798	2.73488
11.6638	7.06512	15.061	5.9907	17.2016	5.03023	46.2277	3.8907	51.0843	2.8
13.3411	6.88605	16.7209	6.10465	18.875	4.91628	48.311	3.8907	55.2471	2.86512
14.9981	7.04884	17.7713	5.95814	20.7548	4.83488	50.812	3.87442	58.3692	2.91395
16.4632	6.93488	18.8217	5.81163	22.8421	4.76977	55.1919	3.79302	63.3702	2.89767
17.9186	6.98372	19.8595	5.87674	24.9225	4.8186	58.7355	3.76047	67.1231	2.84884
18.7568	6.90233	20.4777	5.9907	27	4.91628	61.8595	3.77674	70.251	2.8
19.7907	7.03256	21.0979	6.07209	28.0349	5.03023	64.1463	3.85814	75.0426	2.8
20.8391	6.9186	23.186	5.9907	28.6599	5.03023	67.0572	3.95581	79.2083	2.81628
21.8682	7.13023	23.6085	5.89302	29.9128	4.9814	70.6037	3.87442	82.75	2.81628
23.1366	6.82093	24.0291	5.82791	30.9593	4.9	71.2335	3.79302	85.876	2.8
24.5833	7.01628	25.2694	5.9907	33.0455	4.85116	73.53	3.71163	89.4147	2.84884
26.6715	6.93488	26.3149	5.92558	35.5514	4.75349	77.4826	3.8093	92.124	2.83256
27.0853	6.98372	27.7762	5.87674	37.22	4.72093	79.9777	3.8907	94.0436	2.78372
28.343	6.85349	28.8101	6.00698	38.8818	4.80233	81.4351	3.90698
29.1696	6.96744	29.8566	5.92558	39.5	4.91628	83.1056	3.84186
31.4641	6.9186	32.7694	5.9907	40.7442	5.01395	83.9399	3.82558
32.7093	7	34.4341	6.02326	42.8275	5.01395	89.3556	3.84186
33.1318	6.90233	36.3169	5.89302	44.2936	4.88372	92.064	3.84186
34.3663	7.16279	38.187	5.97442	44.7122	4.85116	94.1453	3.87442
36.0572	6.75581	39.8595	5.87674	46.5891	4.8186
37.2926	7	42.1415	6.03953	48.4603	4.88372
37.4932	7.13023	43.4012	5.87674	49.0833	4.91628
37.9196	6.96744	45.2694	5.9907	51.1657	4.93256
39.1647	7.04884	46.1085	5.89302	53.0426	4.9
40.8391	6.9186	47.1453	5.97442	54.9167	4.91628
41.6657	7.03256	48.1938	5.86047	56.5853	4.88372
42.7122	6.95116	49.8547	5.95814	57.8362	4.86744
43.3304	7.06512	50.4845	5.87674	60.7461	4.9814
45.0058	6.9186	52.563	5.95814	61.7917	4.91628
46.4574	7.03256	53.6085	5.89302	63.0504	4.76977
47.2994	6.88605	55.688	5.95814	64.9215	4.83488
48.1269	6.98372	58.1919	5.89302	66.5824	4.93256
48.3372	6.95116	60.6841	6.02326	67.8275	5.01395
50	7.01628	61.7316	5.92558	69.0853	4.88372
51.47	6.82093	63.186	5.9907	70.7558	4.8186
52.2946	6.96744	64.6492	5.9093	72.8353	4.88372
52.7171	6.86977	66.311	5.9907	74.2897	4.94884
54.1647	7.04884	68.1938	5.86047	75.1269	4.88372
54.3818	6.90233	70.4777	5.9907	77.8304	4.96512
54.9942	7.11395	72.3527	5.9907	79.9186	4.88372
56.6764	6.85349	73.6085	5.89302	81.5891	4.8186
57.9147	7.04884	75.9031	5.84419	83.4603	4.88372
58.3372	6.95116	77.3527	5.9907	85.1231	4.94884
60.4167	7.01628	79.437	5.97442	85.9525	5.01395
61.2548	6.93488	79.6473	5.94186	89.5039	4.85116
62.501	7	83.1851	6.00698	90.7548	4.83488
63.5494	6.88605	83.3934	6.00698	92.2054	4.96512
65	7.01628	84.4428	5.87674	93.6638	4.96512
65.2112	6.96744	84.6512	5.87674	94.0843	4.9
66.6618	7.09767	87.7713	5.95814
67.2984	6.90233	88.187	5.97442
68.5349	7.13023	88.8178	5.87674
69.5911	6.88605	88.8178	5.87674
71.0378	7.0814	90.8983	5.92558
71.6696	6.96744	91.1047	5.95814
73.7471	7.06512	94.4399	5.92558
73.9593	7
75.8295	7.0814
76.0465	6.93488
77.2849	7.13023
78.5475	6.9186
79.5766	7.13023
80.6347	6.85349
81.657	7.17907
84.3847	6.85349
84.9961	7.0814
86.0446	6.96744
86.8702	7.09767
88.7548	6.93488
90.0019	6.98372
90.6308	6.9186
91.6628	7.0814
93.3372	6.95116
93.9593	7
94.5911	6.88605
