# Supplementary material for: Empirical mode decomposition using deep learning model for financial market forecasting
Source: PeerJ Comput Sci. 2022 Sep 14;8:e1076. doi: 10.7717/peerj-cs.1076 (PMC9575866; doi:10.7717/peerj-cs.1076)
Supplement: Supplemental Information 5 [file peerj-cs-08-1076-s005.csv]

Date	Price	Open	High	Low	Change %
31-May-21	0.05817	0.05796	0.05823	0.05796	0.36%
30-May-21	0.05796	0.05796	0.05796	0.05796	-0.03%
28-May-21	0.05798	0.05812	0.05812	0.05787	-0.25%
27-May-21	0.05812	0.05855	0.05861	0.05808	-0.73%
26-May-21	0.05855	0.05893	0.05912	0.05854	-0.64%
25-May-21	0.05893	0.05897	0.05917	0.05875	-0.07%
24-May-21	0.05897	0.05905	0.05918	0.05897	-0.14%
23-May-21	0.05905	0.05905	0.05905	0.05905	-0.01%
21-May-21	0.05906	0.05913	0.05923	0.05903	-0.12%
20-May-21	0.05913	0.05892	0.05918	0.05889	0.34%
19-May-21	0.05892	0.05902	0.05925	0.05881	-0.16%
18-May-21	0.05902	0.05898	0.05903	0.05885	0.06%
17-May-21	0.05898	0.05885	0.05904	0.05885	0.22%
16-May-21	0.05885	0.05885	0.05885	0.05885	0.00%
14-May-21	0.05885	0.05892	0.059	0.0588	-0.11%
13-May-21	0.05892	0.05888	0.05897	0.05882	0.07%
12-May-21	0.05888	0.05919	0.05927	0.05886	-0.53%
11-May-21	0.05919	0.05898	0.05929	0.0589	0.36%
10-May-21	0.05898	0.05924	0.05924	0.05894	-0.45%
9-May-21	0.05924	0.05924	0.05924	0.05924	0.02%
7-May-21	0.05923	0.05928	0.05938	0.05906	-0.07%
6-May-21	0.05928	0.05926	0.05946	0.05919	0.03%
5-May-21	0.05926	0.05921	0.05929	0.05911	0.08%
4-May-21	0.05921	0.05934	0.05934	0.05908	-0.21%
3-May-21	0.05934	0.05921	0.05942	0.05902	0.21%
2-May-21	0.05921	0.05921	0.05921	0.05921	0.01%
30-Apr-21	0.05921	0.05944	0.0595	0.05921	-0.40%
29-Apr-21	0.05944	0.05969	0.05973	0.05927	-0.41%
28-Apr-21	0.05969	0.0596	0.05969	0.05946	0.14%
27-Apr-21	0.0596	0.05996	0.06009	0.0596	-0.59%
26-Apr-21	0.05996	0.06	0.06024	0.05995	-0.07%
25-Apr-21	0.06	0.06	0.06	0.06	-0.35%
23-Apr-21	0.06021	0.06012	0.06036	0.06009	0.16%
22-Apr-21	0.06012	0.06009	0.06014	0.05998	0.04%
21-Apr-21	0.06009	0.06012	0.06026	0.06	-0.06%
20-Apr-21	0.06012	0.06021	0.06026	0.05987	-0.15%
19-Apr-21	0.06021	0.06004	0.06031	0.06004	0.29%
18-Apr-21	0.06004	0.05995	0.06004	0.05995	0.18%
16-Apr-21	0.05993	0.06001	0.06004	0.05988	-0.13%
15-Apr-21	0.06001	0.05997	0.06007	0.05996	0.06%
14-Apr-21	0.05997	0.0601	0.06014	0.05988	-0.22%
13-Apr-21	0.0601	0.05988	0.0601	0.05969	0.38%
12-Apr-21	0.05988	0.05957	0.05996	0.05953	0.53%
11-Apr-21	0.05957	0.05957	0.05957	0.05957	-0.32%
9-Apr-21	0.05976	0.05993	0.05997	0.05961	-0.29%
8-Apr-21	0.05993	0.0598	0.06008	0.05976	0.63%
7-Apr-21	0.05956	0.05953	0.05967	0.05937	0.05%
6-Apr-21	0.05953	0.05926	0.05962	0.05909	0.46%
5-Apr-21	0.05926	0.05937	0.05937	0.05915	-0.19%
4-Apr-21	0.05937	0.05937	0.05937	0.05937	0.00%
2-Apr-21	0.05937	0.05936	0.05937	0.05936	0.03%
1-Apr-21	0.05936	0.05915	0.0594	0.05915	0.35%
31-Mar-21	0.05915	0.05957	0.0596	0.05912	-0.69%
30-Mar-21	0.05956	0.05982	0.05984	0.05948	-0.43%
29-Mar-21	0.05982	0.05957	0.0599	0.05957	0.41%
28-Mar-21	0.05957	0.05957	0.05957	0.05957	-0.10%
26-Mar-21	0.05964	0.05995	0.05995	0.05956	-0.53%
25-Mar-21	0.05995	0.05999	0.06002	0.05983	-0.06%
24-Mar-21	0.05999	0.06004	0.06016	0.0599	-0.09%
23-Mar-21	0.06004	0.05981	0.06006	0.05979	0.38%
22-Mar-21	0.05981	0.05984	0.05993	0.05979	-0.04%
21-Mar-21	0.05984	0.05978	0.05984	0.05978	0.12%
19-Mar-21	0.05976	0.05973	0.05986	0.05964	0.08%
18-Mar-21	0.05971	0.05973	0.05978	0.05945	-0.02%
17-Mar-21	0.05973	0.05966	0.05983	0.05948	0.11%
16-Mar-21	0.05966	0.05955	0.05975	0.0595	0.19%
15-Mar-21	0.05955	0.0597	0.05978	0.05928	-0.25%
14-Mar-21	0.0597	0.0597	0.0597	0.0597	0.03%
12-Mar-21	0.05968	0.05983	0.05985	0.05948	-0.24%
11-Mar-21	0.05983	0.06	0.06002	0.05968	-0.28%
10-Mar-21	0.06	0.0599	0.06003	0.05978	0.15%
9-Mar-21	0.05991	0.0599	0.06007	0.05974	0.02%
8-Mar-21	0.0599	0.05997	0.06018	0.0599	-0.12%
7-Mar-21	0.05997	0.05997	0.05997	0.05997	0.04%
5-Mar-21	0.05995	0.05993	0.0601	0.05971	0.03%
4-Mar-21	0.05993	0.06042	0.06047	0.05991	-0.81%
3-Mar-21	0.06042	0.06061	0.06063	0.06035	-0.32%
2-Mar-21	0.06061	0.06051	0.06066	0.06046	0.17%
1-Mar-21	0.06051	0.06078	0.06082	0.0605	-0.45%
28-Feb-21	0.06078	0.06078	0.06078	0.06078	0.00%
26-Feb-21	0.06078	0.06068	0.06107	0.06064	0.16%
25-Feb-21	0.06068	0.06095	0.06095	0.06067	-0.45%
24-Feb-21	0.06095	0.06143	0.06143	0.06087	-0.77%
23-Feb-21	0.06143	0.06157	0.0616	0.0613	-0.23%
22-Feb-21	0.06157	0.06139	0.06158	0.06112	0.29%
21-Feb-21	0.06139	0.06139	0.06139	0.06139	0.22%
19-Feb-21	0.06126	0.0614	0.0614	0.06098	-0.23%
18-Feb-21	0.0614	0.061	0.06142	0.06092	0.65%
17-Feb-21	0.061	0.06086	0.06109	0.06074	0.23%
16-Feb-21	0.06086	0.06128	0.06137	0.06082	-0.70%
15-Feb-21	0.06128	0.06155	0.06155	0.06118	-0.43%
14-Feb-21	0.06155	0.06155	0.06155	0.06155	0.00%
12-Feb-21	0.06155	0.06165	0.06165	0.06131	-0.16%
11-Feb-21	0.06165	0.06172	0.06176	0.06148	-0.11%
10-Feb-21	0.06172	0.06154	0.06175	0.06147	0.29%
9-Feb-21	0.06154	0.06129	0.06166	0.06129	0.42%
8-Feb-21	0.06129	0.06134	0.06135	0.06109	-0.09%
7-Feb-21	0.06134	0.06134	0.06134	0.06134	-0.02%
5-Feb-21	0.06136	0.06132	0.06145	0.06116	0.06%
4-Feb-21	0.06132	0.06153	0.06154	0.06128	-0.35%
3-Feb-21	0.06153	0.06148	0.06159	0.06146	0.09%
2-Feb-21	0.06148	0.06164	0.06168	0.06141	-0.26%
1-Feb-21	0.06164	0.06139	0.06173	0.06139	0.41%
31-Jan-21	0.06139	0.06139	0.06139	0.06139	0.02%
29-Jan-21	0.06138	0.06182	0.06203	0.06132	-0.72%
28-Jan-21	0.06182	0.06226	0.06226	0.0618	-0.71%
27-Jan-21	0.06226	0.0624	0.06242	0.06222	-0.22%
26-Jan-21	0.0624	0.06245	0.06256	0.06234	-0.08%
25-Jan-21	0.06245	0.06244	0.06247	0.0623	0.02%
24-Jan-21	0.06244	0.06244	0.06244	0.06244	-0.04%
22-Jan-21	0.06246	0.06243	0.06252	0.06231	0.06%
21-Jan-21	0.06243	0.06245	0.06255	0.06236	-0.04%
20-Jan-21	0.06245	0.06237	0.06247	0.06228	0.13%
19-Jan-21	0.06237	0.06262	0.06262	0.06229	-0.40%
18-Jan-21	0.06262	0.06241	0.06264	0.06241	0.33%
17-Jan-21	0.06241	0.06241	0.06241	0.06241	0.03%
15-Jan-21	0.06239	0.06235	0.06246	0.0623	0.06%
14-Jan-21	0.06235	0.06228	0.06252	0.0621	0.11%
13-Jan-21	0.06228	0.0623	0.06238	0.06215	-0.03%
12-Jan-21	0.0623	0.06224	0.06232	0.06197	0.10%
11-Jan-21	0.06224	0.06227	0.06249	0.0621	-0.05%
10-Jan-21	0.06227	0.06227	0.06227	0.06227	-0.03%
8-Jan-21	0.06229	0.0624	0.0624	0.06215	-0.18%
7-Jan-21	0.0624	0.06273	0.06277	0.0623	-0.52%
6-Jan-21	0.06273	0.06289	0.06298	0.06248	-0.25%
5-Jan-21	0.06289	0.06265	0.06301	0.06239	0.38%
4-Jan-21	0.06265	0.06317	0.06317	0.06261	-0.83%
3-Jan-21	0.06317	0.06317	0.06317	0.06317	0.00%
1-Jan-21	0.06317	0.06304	0.06317	0.06304	0.21%
31-Dec-20	0.06304	0.06324	0.06357	0.06304	-0.32%
30-Dec-20	0.06324	0.06308	0.06337	0.06306	0.26%
29-Dec-20	0.06308	0.06302	0.06311	0.06295	0.09%
28-Dec-20	0.06302	0.0632	0.06323	0.06293	-0.28%
27-Dec-20	0.0632	0.0632	0.0632	0.0632	0.00%
25-Dec-20	0.0632	0.063	0.0632	0.063	0.31%
24-Dec-20	0.063	0.06316	0.06321	0.06296	-0.24%
23-Dec-20	0.06316	0.0632	0.06348	0.06312	-0.07%
22-Dec-20	0.0632	0.0634	0.0634	0.06308	-0.31%
21-Dec-20	0.0634	0.06327	0.06348	0.06309	0.20%
20-Dec-20	0.06327	0.06327	0.06327	0.06327	-0.03%
18-Dec-20	0.06329	0.06335	0.06335	0.06315	-0.10%
17-Dec-20	0.06335	0.06313	0.06348	0.0631	0.35%
16-Dec-20	0.06313	0.0631	0.06325	0.06288	0.05%
15-Dec-20	0.0631	0.06298	0.06311	0.06277	0.19%
14-Dec-20	0.06298	0.06294	0.06321	0.06285	0.07%
13-Dec-20	0.06294	0.06294	0.06294	0.06294	0.02%
11-Dec-20	0.06293	0.06282	0.06304	0.06279	0.17%
10-Dec-20	0.06282	0.06275	0.06283	0.06259	0.11%
9-Dec-20	0.06275	0.06274	0.0628	0.06259	0.02%
8-Dec-20	0.06274	0.06279	0.06284	0.06269	-0.08%
7-Dec-20	0.06279	0.0627	0.06287	0.06267	0.15%
6-Dec-20	0.0627	0.06266	0.06271	0.06262	0.05%
4-Dec-20	0.06266	0.06303	0.06312	0.06266	-0.58%
3-Dec-20	0.06303	0.06283	0.06311	0.0627	0.31%
2-Dec-20	0.06283	0.06301	0.06308	0.06259	-0.28%
1-Dec-20	0.06301	0.06306	0.06325	0.06281	-0.08%
30-Nov-20	0.06306	0.06315	0.06332	0.06296	-0.15%
29-Nov-20	0.06315	0.06322	0.06322	0.06311	-0.04%
27-Nov-20	0.06317	0.06307	0.06333	0.06306	0.16%
26-Nov-20	0.06307	0.06301	0.06313	0.06278	0.09%
25-Nov-20	0.06301	0.06306	0.06312	0.06277	-0.08%
24-Nov-20	0.06306	0.06303	0.06313	0.06288	0.06%
23-Nov-20	0.06303	0.06316	0.06343	0.06295	-0.21%
22-Nov-20	0.06316	0.06323	0.06323	0.06316	-0.09%
20-Nov-20	0.06322	0.06342	0.06343	0.06317	-0.32%
19-Nov-20	0.06342	0.06316	0.06348	0.06307	0.41%
18-Nov-20	0.06316	0.06293	0.0633	0.06288	0.36%
17-Nov-20	0.06293	0.06298	0.06312	0.06277	-0.08%
16-Nov-20	0.06298	0.06305	0.06327	0.06264	-0.11%
15-Nov-20	0.06305	0.06302	0.06312	0.06302	-0.13%
13-Nov-20	0.06314	0.06295	0.06319	0.06289	0.30%
12-Nov-20	0.06295	0.06291	0.06306	0.06269	0.06%
11-Nov-20	0.06291	0.06285	0.06297	0.06256	0.10%
10-Nov-20	0.06285	0.06307	0.06334	0.06256	-0.35%
9-Nov-20	0.06307	0.06393	0.0641	0.06276	-1.34%
8-Nov-20	0.06392	0.0639	0.06399	0.0639	-0.09%
6-Nov-20	0.06398	0.06375	0.0642	0.0637	0.36%
5-Nov-20	0.06375	0.06373	0.06393	0.06346	0.03%
4-Nov-20	0.06373	0.06385	0.06426	0.06359	-0.18%
3-Nov-20	0.06385	0.06389	0.06404	0.06368	-0.07%
2-Nov-20	0.06389	0.06403	0.06407	0.06378	-0.21%
1-Nov-20	0.06403	0.06404	0.06405	0.06396	0.13%
30-Oct-20	0.06395	0.06421	0.06428	0.06383	-0.45%
29-Oct-20	0.06424	0.0645	0.06452	0.0641	-0.41%
28-Oct-20	0.0645	0.06413	0.06459	0.06413	0.57%
27-Oct-20	0.06413	0.06404	0.06426	0.06394	0.15%
26-Oct-20	0.06404	0.06394	0.06405	0.06362	0.16%
25-Oct-20	0.06394	0.06388	0.06397	0.06388	0.09%
23-Oct-20	0.06388	0.06375	0.0639	0.06364	0.21%
22-Oct-20	0.06375	0.06355	0.06394	0.06352	0.31%
21-Oct-20	0.06355	0.0633	0.06372	0.06312	0.39%
20-Oct-20	0.0633	0.06336	0.06346	0.06317	-0.09%
19-Oct-20	0.06336	0.06355	0.06362	0.06334	-0.30%
18-Oct-20	0.06355	0.06353	0.06361	0.06353	0.03%
16-Oct-20	0.06353	0.06383	0.06401	0.06351	-0.47%
15-Oct-20	0.06383	0.06386	0.06405	0.06374	-0.05%
14-Oct-20	0.06386	0.06397	0.06411	0.06381	-0.17%
13-Oct-20	0.06397	0.06403	0.06417	0.06378	-0.10%
12-Oct-20	0.06403	0.06343	0.06413	0.06341	0.96%
11-Oct-20	0.06343	0.06336	0.06344	0.06331	0.09%
9-Oct-20	0.06337	0.06404	0.06429	0.06324	-1.05%
8-Oct-20	0.06404	0.06422	0.06427	0.064	-0.29%
7-Oct-20	0.06422	0.06426	0.0643	0.06398	-0.06%
6-Oct-20	0.06426	0.06424	0.06445	0.06422	0.04%
5-Oct-20	0.06424	0.06433	0.06446	0.06418	-0.15%
4-Oct-20	0.06433	0.0645	0.0645	0.06431	-0.24%
2-Oct-20	0.06449	0.06434	0.06477	0.06426	0.23%
1-Oct-20	0.06434	0.06439	0.06447	0.06423	-0.08%
30-Sep-20	0.06439	0.06451	0.06464	0.06421	-0.19%
29-Sep-20	0.06451	0.0646	0.06473	0.06445	-0.14%
28-Sep-20	0.0646	0.06461	0.06487	0.06446	-0.01%
27-Sep-20	0.06461	0.06472	0.06472	0.0646	-0.02%
25-Sep-20	0.06463	0.0647	0.06481	0.06457	-0.11%
24-Sep-20	0.0647	0.06466	0.06489	0.06446	0.07%
23-Sep-20	0.06466	0.06455	0.06475	0.06444	0.17%
22-Sep-20	0.06455	0.06501	0.06513	0.0645	-0.71%
21-Sep-20	0.06501	0.06472	0.06532	0.06461	0.43%
20-Sep-20	0.06472	0.06471	0.06478	0.06471	-0.03%
18-Sep-20	0.06475	0.06465	0.06496	0.06442	0.16%
17-Sep-20	0.06465	0.06432	0.0648	0.06428	0.51%
16-Sep-20	0.06432	0.06437	0.0646	0.0642	-0.09%
15-Sep-20	0.06437	0.06442	0.0645	0.06401	-0.06%
14-Sep-20	0.06441	0.06442	0.06458	0.06432	-0.01%
13-Sep-20	0.06442	0.06444	0.06447	0.06438	0.04%
11-Sep-20	0.0644	0.06439	0.06445	0.0643	0.01%
10-Sep-20	0.06439	0.06433	0.06453	0.06412	0.09%
9-Sep-20	0.06433	0.0646	0.06479	0.0643	-0.42%
8-Sep-20	0.0646	0.06424	0.06473	0.06424	0.55%
7-Sep-20	0.06424	0.06439	0.06443	0.06424	-0.23%
6-Sep-20	0.06439	0.06435	0.06443	0.06434	-0.05%
4-Sep-20	0.06443	0.06455	0.06455	0.06422	-0.19%
3-Sep-20	0.06455	0.06441	0.06458	0.06417	0.21%
2-Sep-20	0.06441	0.06448	0.06451	0.0642	-0.11%
1-Sep-20	0.06448	0.06461	0.06477	0.06432	-0.20%
31-Aug-20	0.06461	0.06499	0.06539	0.06452	-0.57%
30-Aug-20	0.06499	0.0651	0.06515	0.0649	-0.27%
28-Aug-20	0.06516	0.06465	0.06539	0.06429	0.79%
27-Aug-20	0.06465	0.06504	0.06508	0.06441	-0.60%
26-Aug-20	0.06504	0.065	0.06505	0.06477	0.06%
25-Aug-20	0.065	0.06528	0.06548	0.06488	-0.44%
24-Aug-20	0.06528	0.06535	0.06545	0.06525	-0.10%
23-Aug-20	0.06535	0.06543	0.06543	0.06532	-0.07%
21-Aug-20	0.06539	0.06543	0.06557	0.06524	-0.06%
20-Aug-20	0.06543	0.06527	0.06544	0.06517	0.24%
19-Aug-20	0.06527	0.06576	0.06584	0.0652	-0.75%
18-Aug-20	0.06576	0.06541	0.06577	0.06534	0.55%
17-Aug-20	0.06541	0.06517	0.06544	0.06509	0.36%
16-Aug-20	0.06517	0.0652	0.06525	0.06514	-0.04%
14-Aug-20	0.0652	0.06494	0.0653	0.06489	0.42%
13-Aug-20	0.06492	0.06493	0.06517	0.06489	-0.02%
12-Aug-20	0.06493	0.06523	0.06529	0.06485	-0.45%
11-Aug-20	0.06523	0.06571	0.06578	0.06511	-0.74%
10-Aug-20	0.06571	0.06586	0.0659	0.06559	-0.22%
9-Aug-20	0.06586	0.06579	0.06587	0.06577	0.11%
7-Aug-20	0.06578	0.06585	0.06604	0.0656	-0.10%
6-Aug-20	0.06585	0.06573	0.066	0.06569	0.20%
5-Aug-20	0.06572	0.066	0.06607	0.06557	-0.42%
4-Aug-20	0.066	0.06583	0.06602	0.06572	0.25%
3-Aug-20	0.06583	0.06593	0.0661	0.0656	-0.16%
2-Aug-20	0.06593	0.06602	0.06602	0.06589	-0.06%
31-Jul-20	0.06597	0.06695	0.06713	0.06579	-1.47%
30-Jul-20	0.06695	0.06668	0.06699	0.06642	0.40%
29-Jul-20	0.06669	0.06662	0.06683	0.06653	0.10%
28-Jul-20	0.06662	0.06644	0.0667	0.06624	0.27%
27-Jul-20	0.06644	0.06622	0.06658	0.06604	0.34%
26-Jul-20	0.06622	0.06623	0.06631	0.06618	0.16%
24-Jul-20	0.06611	0.06557	0.06639	0.06557	0.81%
23-Jul-20	0.06557	0.06534	0.06566	0.06506	0.37%
22-Jul-20	0.06534	0.06539	0.06553	0.06515	-0.08%
21-Jul-20	0.06539	0.06515	0.06543	0.06509	0.37%
20-Jul-20	0.06515	0.06521	0.06533	0.06505	-0.09%
19-Jul-20	0.06521	0.06537	0.06537	0.06519	-0.19%
17-Jul-20	0.06533	0.06514	0.06542	0.06508	0.29%
16-Jul-20	0.06514	0.06539	0.06561	0.06507	-0.37%
15-Jul-20	0.06539	0.06534	0.06552	0.0652	0.07%
14-Jul-20	0.06534	0.06526	0.06547	0.06513	0.13%
13-Jul-20	0.06526	0.06533	0.06551	0.06518	-0.11%
12-Jul-20	0.06533	0.06536	0.06537	0.0653	-0.23%
10-Jul-20	0.06547	0.06523	0.06569	0.0652	0.38%
9-Jul-20	0.06523	0.06529	0.06536	0.06503	-0.10%
8-Jul-20	0.06529	0.06522	0.06536	0.06511	0.11%
7-Jul-20	0.06522	0.06538	0.06571	0.06516	-0.24%
6-Jul-20	0.06538	0.0657	0.0657	0.06524	-0.49%
5-Jul-20	0.0657	0.06576	0.06577	0.06568	-0.03%
3-Jul-20	0.06572	0.06574	0.06588	0.06568	-0.04%
2-Jul-20	0.06574	0.06587	0.06588	0.06552	-0.20%
1-Jul-20	0.06587	0.06543	0.06588	0.06533	0.67%
30-Jun-20	0.06543	0.06582	0.06585	0.06541	-0.59%
29-Jun-20	0.06582	0.06599	0.06612	0.06561	-0.26%
28-Jun-20	0.06599	0.06604	0.06609	0.06598	-0.03%
26-Jun-20	0.06601	0.06608	0.0663	0.06577	-0.10%
25-Jun-20	0.06608	0.06612	0.0662	0.06575	-0.06%
24-Jun-20	0.06612	0.0663	0.06648	0.06607	-0.26%
23-Jun-20	0.0663	0.06611	0.06658	0.06592	0.28%
22-Jun-20	0.06611	0.0662	0.06633	0.06598	-0.13%
21-Jun-20	0.0662	0.06617	0.06625	0.06614	0.06%
19-Jun-20	0.06616	0.06625	0.06639	0.06607	-0.14%
18-Jun-20	0.06625	0.06629	0.06649	0.06608	-0.06%
17-Jun-20	0.06629	0.06597	0.06631	0.06592	0.49%
16-Jun-20	0.06597	0.06595	0.06615	0.06572	0.02%
15-Jun-20	0.06595	0.06604	0.06625	0.06594	-0.12%
14-Jun-20	0.06604	0.06608	0.06611	0.06594	0.13%
12-Jun-20	0.06595	0.06617	0.06639	0.06578	-0.33%
11-Jun-20	0.06617	0.06602	0.06631	0.06592	0.23%
10-Jun-20	0.06602	0.06565	0.06609	0.06559	0.57%
9-Jun-20	0.06565	0.06522	0.06578	0.06522	0.65%
8-Jun-20	0.06522	0.06441	0.06531	0.06441	1.25%
7-Jun-20	0.06441	0.06454	0.06457	0.06441	-0.26%
5-Jun-20	0.06458	0.06515	0.06522	0.0645	-0.87%
4-Jun-20	0.06515	0.06528	0.06554	0.06508	-0.19%
3-Jun-20	0.06528	0.06525	0.0656	0.06525	0.04%
2-Jun-20	0.06525	0.0663	0.06631	0.06522	-1.58%
1-Jun-20	0.0663	0.06616	0.06648	0.06603	0.21%
31-May-20	0.06616	0.06615	0.06624	0.06612	-0.07%
29-May-20	0.06621	0.06637	0.06677	0.06614	-0.25%
28-May-20	0.06637	0.0665	0.06654	0.06629	-0.19%
27-May-20	0.0665	0.06637	0.06664	0.06615	0.19%
26-May-20	0.06637	0.06627	0.06644	0.06594	0.16%
25-May-20	0.06627	0.06615	0.06634	0.06613	0.17%
24-May-20	0.06615	0.0663	0.0663	0.06613	-0.17%
22-May-20	0.06627	0.06609	0.06647	0.06601	0.26%
21-May-20	0.06609	0.06592	0.06618	0.06574	0.27%
20-May-20	0.06592	0.06585	0.06609	0.06572	0.10%
19-May-20	0.06585	0.06621	0.06628	0.06571	-0.54%
18-May-20	0.06621	0.06623	0.0664	0.06611	-0.03%
17-May-20	0.06623	0.06636	0.06636	0.06616	-0.05%
15-May-20	0.06626	0.06609	0.06649	0.06598	0.25%
14-May-20	0.06609	0.06631	0.06659	0.06606	-0.34%
13-May-20	0.06631	0.06612	0.06642	0.06603	0.29%
12-May-20	0.06612	0.066	0.06615	0.06587	0.19%
11-May-20	0.066	0.06617	0.06627	0.06586	-0.26%
10-May-20	0.06617	0.06648	0.06648	0.06617	-0.25%
8-May-20	0.06634	0.06659	0.0667	0.06626	-0.38%
7-May-20	0.06659	0.06691	0.06694	0.06641	-0.48%
6-May-20	0.06691	0.06635	0.06704	0.06635	0.84%
5-May-20	0.06635	0.06618	0.06637	0.06604	0.25%
4-May-20	0.06618	0.0661	0.06623	0.06562	0.12%
3-May-20	0.0661	0.06595	0.06612	0.06594	0.35%
1-May-20	0.06587	0.06585	0.06607	0.06569	0.03%
30-Apr-20	0.06585	0.06639	0.06642	0.06569	-0.82%
29-Apr-20	0.06639	0.06631	0.06659	0.06627	0.12%
28-Apr-20	0.06631	0.06606	0.0664	0.06599	0.39%
27-Apr-20	0.06606	0.06588	0.06622	0.06555	0.27%
26-Apr-20	0.06588	0.06584	0.06595	0.0658	-0.03%
24-Apr-20	0.0659	0.06566	0.06597	0.06558	0.36%
23-Apr-20	0.06566	0.06571	0.06595	0.0655	-0.08%
22-Apr-20	0.06571	0.06585	0.06589	0.06562	-0.22%
21-Apr-20	0.06585	0.06568	0.06611	0.06561	0.25%
20-Apr-20	0.06568	0.06576	0.06576	0.06537	-0.12%
19-Apr-20	0.06576	0.06582	0.06585	0.06575	-0.02%
17-Apr-20	0.06577	0.06561	0.06592	0.06556	0.25%
16-Apr-20	0.06561	0.06568	0.06602	0.06544	-0.10%
15-Apr-20	0.06568	0.06581	0.06598	0.06554	-0.20%
14-Apr-20	0.06581	0.06549	0.0659	0.06495	0.48%
13-Apr-20	0.06549	0.06499	0.06562	0.06476	0.77%
12-Apr-20	0.06499	0.06482	0.06502	0.06482	0.00%
10-Apr-20	0.06499	0.06488	0.06499	0.06482	0.17%
9-Apr-20	0.06488	0.06487	0.06511	0.06465	0.00%
8-Apr-20	0.06488	0.06487	0.06506	0.06471	0.00%
7-Apr-20	0.06487	0.06498	0.06529	0.0646	-0.17%
6-Apr-20	0.06498	0.06528	0.06528	0.06486	-0.45%
5-Apr-20	0.06528	0.0654	0.06542	0.06525	-0.26%
3-Apr-20	0.06545	0.0656	0.06578	0.06525	-0.23%
2-Apr-20	0.0656	0.06618	0.06629	0.06549	-0.88%
1-Apr-20	0.06618	0.06592	0.0664	0.06565	0.40%
31-Mar-20	0.06592	0.0657	0.06594	0.06525	0.34%
30-Mar-20	0.0657	0.06609	0.06651	0.06555	-0.59%
29-Mar-20	0.06609	0.06603	0.06611	0.06586	0.47%
27-Mar-20	0.06578	0.06483	0.06586	0.06468	1.46%
26-Mar-20	0.06483	0.06414	0.06483	0.06407	1.08%
25-Mar-20	0.06414	0.06356	0.06418	0.06341	0.91%
24-Mar-20	0.06356	0.06399	0.06434	0.06324	-0.67%
23-Mar-20	0.06399	0.06425	0.06463	0.06355	-0.39%
22-Mar-20	0.06425	0.06396	0.06429	0.06394	0.48%
20-Mar-20	0.06394	0.06388	0.06454	0.0636	0.09%
19-Mar-20	0.06388	0.06503	0.06527	0.06382	-1.77%
18-Mar-20	0.06503	0.06525	0.06573	0.06482	-0.34%
17-Mar-20	0.06525	0.06587	0.06599	0.06496	-0.94%
16-Mar-20	0.06587	0.06539	0.06674	0.06522	0.75%
15-Mar-20	0.06539	0.06572	0.06588	0.06489	0.78%
13-Mar-20	0.06488	0.06721	0.06721	0.06464	-3.46%
12-Mar-20	0.06721	0.06659	0.06771	0.06634	0.93%
11-Mar-20	0.06659	0.06624	0.06679	0.066	0.53%
10-Mar-20	0.06624	0.06736	0.06764	0.06568	-1.66%
9-Mar-20	0.06736	0.0661	0.0686	0.066	1.91%
8-Mar-20	0.0661	0.06616	0.06631	0.06594	0.41%
6-Mar-20	0.06582	0.0653	0.06603	0.06524	0.81%
5-Mar-20	0.0653	0.06432	0.06546	0.06432	1.52%
4-Mar-20	0.06432	0.06503	0.06503	0.06432	-1.09%
3-Mar-20	0.06503	0.06418	0.06514	0.06418	1.33%
2-Mar-20	0.06418	0.06478	0.06485	0.06411	-0.92%
1-Mar-20	0.06478	0.06498	0.06498	0.06469	0.14%
28-Feb-20	0.06468	0.06388	0.06503	0.06388	1.26%
27-Feb-20	0.06388	0.06361	0.06403	0.06349	0.43%
26-Feb-20	0.06361	0.06359	0.06375	0.06337	0.02%
25-Feb-20	0.06359	0.06342	0.06382	0.06309	0.28%
24-Feb-20	0.06342	0.06303	0.06371	0.06295	0.62%
23-Feb-20	0.06303	0.06331	0.06331	0.06301	0.09%
21-Feb-20	0.06297	0.06272	0.06313	0.06253	0.40%
20-Feb-20	0.06272	0.06293	0.06309	0.0626	-0.33%
19-Feb-20	0.06293	0.06366	0.06378	0.06273	-1.15%
18-Feb-20	0.06366	0.06355	0.0639	0.06355	0.16%
17-Feb-20	0.06355	0.06358	0.06365	0.06349	-0.04%
16-Feb-20	0.06358	0.06355	0.06363	0.06354	-0.13%
14-Feb-20	0.06366	0.06357	0.06372	0.06349	0.14%
13-Feb-20	0.06357	0.06345	0.06371	0.0634	0.18%
12-Feb-20	0.06345	0.06342	0.06359	0.06329	0.05%
11-Feb-20	0.06342	0.06362	0.06365	0.06334	-0.32%
10-Feb-20	0.06362	0.06383	0.06385	0.0635	-0.33%
9-Feb-20	0.06384	0.06383	0.06387	0.06378	0.09%
7-Feb-20	0.06378	0.06338	0.06392	0.06338	0.63%
6-Feb-20	0.06338	0.0635	0.0637	0.06329	-0.19%
5-Feb-20	0.0635	0.06395	0.06404	0.06348	-0.70%
4-Feb-20	0.06395	0.06464	0.06469	0.06388	-1.07%
3-Feb-20	0.06464	0.06403	0.06477	0.06395	0.95%
2-Feb-20	0.06403	0.06394	0.0641	0.06394	0.04%
31-Jan-20	0.064	0.06372	0.06405	0.06355	0.44%
30-Jan-20	0.06372	0.06367	0.06389	0.06362	0.08%
29-Jan-20	0.06367	0.06356	0.06369	0.06349	0.17%
28-Jan-20	0.06356	0.06368	0.0638	0.06349	-0.20%
27-Jan-20	0.06368	0.06376	0.06376	0.06354	-0.12%
26-Jan-20	0.06376	0.06366	0.06376	0.06359	0.41%
24-Jan-20	0.0635	0.06332	0.06354	0.06322	0.29%
23-Jan-20	0.06332	0.06294	0.06349	0.06292	0.59%
22-Jan-20	0.06294	0.06283	0.06296	0.06259	0.18%
21-Jan-20	0.06283	0.06232	0.06292	0.0623	0.82%
20-Jan-20	0.06232	0.06223	0.0626	0.06219	0.14%
19-Jan-20	0.06223	0.06228	0.06229	0.06223	-0.08%
17-Jan-20	0.06228	0.06243	0.06257	0.06219	-0.24%
16-Jan-20	0.06243	0.06271	0.06271	0.0624	-0.44%
15-Jan-20	0.06271	0.06266	0.06277	0.0626	0.08%
14-Jan-20	0.06266	0.06268	0.06274	0.06239	-0.03%
13-Jan-20	0.06268	0.06316	0.06318	0.06268	-0.76%
12-Jan-20	0.06316	0.06318	0.06319	0.06314	-0.07%
10-Jan-20	0.0632	0.06329	0.06346	0.0631	-0.13%
9-Jan-20	0.06329	0.0637	0.0637	0.06325	-0.65%
8-Jan-20	0.0637	0.06425	0.06454	0.06358	-0.86%
7-Jan-20	0.06425	0.06435	0.06442	0.0639	-0.14%
6-Jan-20	0.06435	0.06449	0.06462	0.06425	-0.22%
5-Jan-20	0.06449	0.06452	0.0646	0.06447	0.10%
3-Jan-20	0.06442	0.06415	0.06464	0.06414	0.42%
2-Jan-20	0.06415	0.06421	0.06435	0.06394	-0.11%
1-Jan-20	0.06422	0.06421	0.06456	0.06399	0.02%
31-Dec-19	0.06421	0.06418	0.06429	0.06401	0.04%
30-Dec-19	0.06418	0.06387	0.06423	0.06361	0.48%
29-Dec-19	0.06387	0.0639	0.06393	0.06385	-0.01%
27-Dec-19	0.06388	0.0638	0.06398	0.06371	0.14%
26-Dec-19	0.0638	0.06399	0.064	0.06376	-0.30%
25-Dec-19	0.06399	0.06408	0.06413	0.06252	-0.14%
24-Dec-19	0.06408	0.06412	0.06414	0.06402	-0.06%
23-Dec-19	0.06412	0.06396	0.06416	0.06395	0.26%
22-Dec-19	0.06396	0.06397	0.064	0.06394	-0.08%
20-Dec-19	0.06401	0.06409	0.06422	0.06396	-0.14%
19-Dec-19	0.06409	0.06394	0.06422	0.06386	0.24%
18-Dec-19	0.06394	0.06389	0.06405	0.06385	0.09%
17-Dec-19	0.06389	0.06382	0.06396	0.06379	0.10%
16-Dec-19	0.06382	0.06387	0.06405	0.06375	-0.07%
15-Dec-19	0.06387	0.06389	0.06391	0.06383	-0.10%
13-Dec-19	0.06393	0.06384	0.06403	0.06356	0.14%
12-Dec-19	0.06384	0.06484	0.0649	0.06371	-1.54%
11-Dec-19	0.06484	0.06467	0.06489	0.06466	0.26%
10-Dec-19	0.06467	0.06482	0.06489	0.06464	-0.23%
9-Dec-19	0.06482	0.06477	0.06506	0.06477	0.07%
8-Dec-19	0.06477	0.06478	0.06481	0.06475	0.01%
6-Dec-19	0.06476	0.06478	0.06487	0.06455	-0.03%
5-Dec-19	0.06478	0.06477	0.06485	0.06457	0.02%
4-Dec-19	0.06477	0.065	0.06521	0.06471	-0.35%
3-Dec-19	0.065	0.06456	0.06509	0.06445	0.68%
2-Dec-19	0.06456	0.06405	0.06462	0.06393	0.80%
1-Dec-19	0.06405	0.06402	0.06407	0.06399	-0.28%
29-Nov-19	0.06423	0.06424	0.06429	0.06406	-0.02%
28-Nov-19	0.06424	0.06427	0.06433	0.06417	-0.05%
27-Nov-19	0.06427	0.06447	0.06449	0.06413	-0.30%
26-Nov-19	0.06447	0.06456	0.06467	0.06436	-0.15%
25-Nov-19	0.06456	0.06473	0.06492	0.06454	-0.26%
24-Nov-19	0.06473	0.06479	0.06481	0.06472	-0.08%
22-Nov-19	0.06479	0.06471	0.06491	0.06465	0.11%
21-Nov-19	0.06471	0.06486	0.06505	0.06465	-0.22%
20-Nov-19	0.06486	0.06479	0.06494	0.06451	0.11%
19-Nov-19	0.06479	0.06466	0.06485	0.06441	0.20%
18-Nov-19	0.06466	0.06435	0.06475	0.06421	0.48%
17-Nov-19	0.06435	0.06431	0.06438	0.0643	-0.14%
15-Nov-19	0.06444	0.06471	0.06473	0.06438	-0.41%
14-Nov-19	0.06471	0.06455	0.06482	0.06436	0.25%
13-Nov-19	0.06455	0.06431	0.06467	0.06426	0.37%
12-Nov-19	0.06431	0.06429	0.06432	0.06401	0.02%
11-Nov-19	0.06429	0.06404	0.06436	0.06403	0.40%
10-Nov-19	0.06404	0.06402	0.06406	0.06402	0.00%
8-Nov-19	0.06404	0.06386	0.06413	0.06379	0.29%
7-Nov-19	0.06386	0.06426	0.06458	0.06374	-0.62%
6-Nov-19	0.06426	0.06422	0.06431	0.06409	0.06%
5-Nov-19	0.06422	0.06468	0.06471	0.06417	-0.70%
4-Nov-19	0.06468	0.06503	0.06508	0.06465	-0.55%
3-Nov-19	0.06503	0.06501	0.06505	0.065	-0.01%
1-Nov-19	0.06504	0.06517	0.06534	0.06497	-0.20%
31-Oct-19	0.06517	0.06485	0.06522	0.0646	0.49%
30-Oct-19	0.06485	0.06491	0.06494	0.06456	-0.09%
29-Oct-19	0.06491	0.06486	0.06493	0.06473	0.08%
28-Oct-19	0.06486	0.06496	0.06507	0.06483	-0.15%
27-Oct-19	0.06496	0.06497	0.06501	0.06495	-0.09%
25-Oct-19	0.06501	0.06509	0.06526	0.06495	-0.12%
24-Oct-19	0.06509	0.06504	0.06519	0.06493	0.07%
23-Oct-19	0.06504	0.06524	0.06543	0.06498	-0.30%
22-Oct-19	0.06524	0.06515	0.06529	0.06508	0.14%
21-Oct-19	0.06515	0.06541	0.06542	0.06503	-0.40%
20-Oct-19	0.06541	0.06535	0.06549	0.06535	0.13%
18-Oct-19	0.06533	0.06517	0.06535	0.06501	0.24%
17-Oct-19	0.06517	0.06527	0.06532	0.06489	-0.16%
16-Oct-19	0.06527	0.06508	0.06541	0.06487	0.29%
15-Oct-19	0.06508	0.06522	0.06549	0.065	-0.21%
14-Oct-19	0.06522	0.06537	0.06538	0.06514	-0.23%
11-Oct-19	0.06537	0.06595	0.06598	0.06527	-0.87%
10-Oct-19	0.06595	0.06657	0.06657	0.06589	-0.93%
9-Oct-19	0.06657	0.06679	0.0668	0.06629	-0.33%
8-Oct-19	0.06679	0.06665	0.0669	0.06629	0.22%
7-Oct-19	0.06664	0.06665	0.06668	0.06662	-0.34%
4-Oct-19	0.06687	0.0669	0.06702	0.06674	-0.04%
3-Oct-19	0.0669	0.0667	0.0671	0.06661	0.29%
2-Oct-19	0.0667	0.06633	0.06677	0.06626	0.56%
1-Oct-19	0.06633	0.06615	0.06642	0.06592	0.27%
30-Sep-19	0.06615	0.06598	0.06621	0.06549	0.25%
29-Sep-19	0.06598	0.06596	0.06601	0.06594	0.03%
27-Sep-19	0.06596	0.06619	0.06629	0.06585	-0.34%
26-Sep-19	0.06619	0.06622	0.06637	0.06606	-0.05%
25-Sep-19	0.06622	0.0664	0.0665	0.06613	-0.27%
24-Sep-19	0.0664	0.06614	0.06651	0.06592	0.40%
23-Sep-19	0.06614	0.06588	0.06645	0.06575	0.39%
22-Sep-19	0.06588	0.06586	0.0659	0.06584	-0.06%
20-Sep-19	0.06592	0.06568	0.06597	0.06557	0.37%
19-Sep-19	0.06568	0.06535	0.06589	0.06529	0.50%
18-Sep-19	0.06535	0.06561	0.06561	0.06529	-0.39%
17-Sep-19	0.06561	0.06534	0.06566	0.06529	0.41%
16-Sep-19	0.06534	0.06566	0.06598	0.06533	-0.49%
15-Sep-19	0.06566	0.06588	0.06588	0.06563	0.24%
13-Sep-19	0.06551	0.06545	0.0656	0.06528	0.08%
12-Sep-19	0.06545	0.06587	0.06594	0.06543	-0.63%
11-Sep-19	0.06587	0.06611	0.06616	0.06587	-0.36%
10-Sep-19	0.06611	0.06635	0.06638	0.0661	-0.37%
9-Sep-19	0.06635	0.06657	0.06674	0.06627	-0.32%
8-Sep-19	0.06656	0.06657	0.0666	0.06654	0.03%
6-Sep-19	0.06654	0.06676	0.06685	0.06643	-0.32%
5-Sep-19	0.06676	0.0672	0.0672	0.06674	-0.66%
4-Sep-19	0.0672	0.06781	0.06783	0.06711	-0.90%
3-Sep-19	0.06781	0.06753	0.06789	0.06745	0.41%
2-Sep-19	0.06753	0.06743	0.06763	0.06738	0.14%
1-Sep-19	0.06743	0.06747	0.06758	0.06738	0.14%
30-Aug-19	0.06734	0.06712	0.06742	0.06703	0.33%
29-Aug-19	0.06712	0.06755	0.06772	0.06697	-0.63%
28-Aug-19	0.06755	0.06774	0.06782	0.06747	-0.28%
27-Aug-19	0.06774	0.06748	0.06783	0.06746	0.38%
26-Aug-19	0.06748	0.06678	0.06796	0.06678	1.06%
25-Aug-19	0.06678	0.06662	0.0669	0.0666	-0.84%
23-Aug-19	0.06734	0.06652	0.06744	0.06636	1.23%
22-Aug-19	0.06652	0.06626	0.06675	0.06612	0.40%
21-Aug-19	0.06626	0.06645	0.06645	0.06619	-0.28%
20-Aug-19	0.06645	0.06618	0.06649	0.06608	0.45%
19-Aug-19	0.06615	0.06616	0.06626	0.06599	-0.01%
18-Aug-19	0.06616	0.06622	0.06628	0.06612	-0.08%
16-Aug-19	0.06621	0.06631	0.06654	0.06613	-0.14%
15-Aug-19	0.06631	0.06632	0.06662	0.06584	-0.02%
14-Aug-19	0.06632	0.06606	0.06644	0.06583	0.39%
13-Aug-19	0.06606	0.06698	0.06725	0.06587	-1.36%
12-Aug-19	0.06698	0.06696	0.06719	0.06687	0.02%
11-Aug-19	0.06696	0.0669	0.06703	0.06681	0.18%
9-Aug-19	0.06684	0.06655	0.06709	0.06645	0.45%
8-Aug-19	0.06655	0.06653	0.06663	0.06624	0.03%
7-Aug-19	0.06653	0.06608	0.06692	0.06606	0.67%
6-Aug-19	0.06608	0.06676	0.06676	0.0658	-1.01%
5-Aug-19	0.06676	0.0651	0.0668	0.06509	2.54%
4-Aug-19	0.0651	0.06513	0.06513	0.06506	-0.04%
2-Aug-19	0.06513	0.06422	0.0652	0.06418	1.41%
1-Aug-19	0.06422	0.06325	0.06435	0.06298	1.52%
31-Jul-19	0.06325	0.06343	0.06348	0.06319	-0.27%
30-Jul-19	0.06343	0.06332	0.06347	0.06307	0.17%
29-Jul-19	0.06332	0.0633	0.06348	0.0633	0.03%
28-Jul-19	0.0633	0.06331	0.06334	0.06328	0.03%
26-Jul-19	0.06328	0.06324	0.06337	0.06319	0.06%
25-Jul-19	0.06324	0.06352	0.06373	0.06319	-0.44%
24-Jul-19	0.06352	0.06355	0.06382	0.06349	-0.04%
23-Jul-19	0.06355	0.06378	0.06385	0.06353	-0.34%
22-Jul-19	0.06377	0.06377	0.06384	0.06366	-0.01%
21-Jul-19	0.06377	0.06383	0.06385	0.06377	-0.13%
19-Jul-19	0.06386	0.06404	0.06408	0.06375	-0.28%
18-Jul-19	0.06404	0.06368	0.06415	0.06368	0.56%
17-Jul-19	0.06368	0.06355	0.06371	0.06348	0.21%
16-Jul-19	0.06355	0.06374	0.06376	0.06344	-0.31%
15-Jul-19	0.06374	0.0638	0.0638	0.06344	-0.08%
14-Jul-19	0.0638	0.06374	0.06381	0.06374	0.04%
12-Jul-19	0.06377	0.06329	0.06383	0.06325	0.75%
11-Jul-19	0.06329	0.06343	0.06365	0.06329	-0.22%
10-Jul-19	0.06343	0.06323	0.06347	0.06315	0.31%
9-Jul-19	0.06323	0.0633	0.06356	0.06316	-0.10%
8-Jul-19	0.0633	0.06354	0.06364	0.06325	-0.38%
7-Jul-19	0.06354	0.06356	0.06359	0.06348	0.00%
5-Jul-19	0.06354	0.06374	0.06379	0.0634	-0.31%
4-Jul-19	0.06374	0.06384	0.06388	0.06369	-0.16%
3-Jul-19	0.06384	0.06359	0.06405	0.06358	0.38%
2-Jul-19	0.06359	0.06323	0.06377	0.06317	0.58%
1-Jul-19	0.06323	0.0634	0.0638	0.06306	-0.28%
30-Jun-19	0.0634	0.06351	0.06351	0.06329	-0.33%
28-Jun-19	0.06361	0.06382	0.06392	0.06359	-0.33%
27-Jun-19	0.06382	0.06385	0.06391	0.0636	-0.04%
26-Jun-19	0.06385	0.06419	0.06419	0.06378	-0.53%
25-Jun-19	0.06419	0.06408	0.06443	0.06401	0.18%
24-Jun-19	0.06408	0.06394	0.06414	0.06387	0.21%
23-Jun-19	0.06394	0.06403	0.06404	0.06391	-0.14%
21-Jun-19	0.06403	0.06387	0.0641	0.06373	0.25%
20-Jun-19	0.06387	0.06386	0.06418	0.06352	0.01%
19-Jun-19	0.06386	0.06357	0.06397	0.06351	0.46%
18-Jun-19	0.06357	0.06379	0.06409	0.06356	-0.34%
17-Jun-19	0.06379	0.06376	0.06383	0.06367	0.05%
16-Jun-19	0.06376	0.06384	0.06386	0.06375	-0.07%
14-Jun-19	0.0638	0.06389	0.06402	0.06369	-0.14%
13-Jun-19	0.06389	0.06376	0.06396	0.06367	0.20%
12-Jun-19	0.06376	0.06371	0.06396	0.06366	0.09%
11-Jun-19	0.06371	0.06395	0.06397	0.06337	-0.38%
10-Jun-19	0.06395	0.06378	0.06397	0.06371	0.27%
9-Jun-19	0.06378	0.06376	0.0638	0.06369	-0.13%
7-Jun-19	0.06386	0.06371	0.06403	0.06362	0.24%
6-Jun-19	0.06371	0.06379	0.06402	0.06365	-0.14%
5-Jun-19	0.06379	0.06381	0.06404	0.0636	-0.03%
4-Jun-19	0.06381	0.06392	0.06405	0.06375	-0.17%
3-Jun-19	0.06392	0.06384	0.064	0.06351	0.12%
2-Jun-19	0.06384	0.06382	0.06387	0.0638	0.04%
31-May-19	0.06382	0.06311	0.06384	0.06308	1.13%
30-May-19	0.06311	0.06312	0.06316	0.06284	-0.02%
29-May-19	0.06312	0.06317	0.06335	0.06304	-0.09%
28-May-19	0.06317	0.06298	0.0633	0.0629	0.31%
27-May-19	0.06298	0.06292	0.06306	0.06286	0.09%
26-May-19	0.06292	0.06298	0.06299	0.06292	-0.32%
24-May-19	0.06313	0.06306	0.06315	0.06288	0.10%
23-May-19	0.06306	0.06267	0.06314	0.06265	0.62%
22-May-19	0.06267	0.06243	0.06268	0.06228	0.39%
21-May-19	0.06243	0.06282	0.06282	0.06236	-0.62%
20-May-19	0.06282	0.06278	0.06299	0.06243	0.06%
19-May-19	0.06278	0.0628	0.06287	0.06276	-0.16%
17-May-19	0.06288	0.06266	0.06314	0.06256	0.35%
16-May-19	0.06266	0.0628	0.06293	0.0626	-0.23%
15-May-19	0.0628	0.0627	0.06301	0.06248	0.15%
14-May-19	0.0627	0.063	0.06301	0.06262	-0.47%
13-May-19	0.063	0.06225	0.06311	0.06219	1.21%
12-May-19	0.06225	0.06219	0.06227	0.06213	0.26%
10-May-19	0.06209	0.06218	0.06232	0.06177	-0.15%
9-May-19	0.06218	0.06164	0.06236	0.06147	0.87%
8-May-19	0.06164	0.06145	0.06167	0.06136	0.32%
7-May-19	0.06145	0.06103	0.06153	0.06103	0.68%
6-May-19	0.06103	0.06096	0.0613	0.06081	0.12%
5-May-19	0.06096	0.06102	0.06104	0.06079	0.55%
3-May-19	0.06063	0.0604	0.06063	0.06032	0.37%
2-May-19	0.0604	0.06064	0.06064	0.0603	-0.39%
1-May-19	0.06064	0.06044	0.06073	0.06027	0.33%
30-Apr-19	0.06044	0.06027	0.06056	0.06007	0.28%
29-Apr-19	0.06027	0.0602	0.06033	0.06013	0.11%
28-Apr-19	0.0602	0.06028	0.06029	0.06019	-0.20%
26-Apr-19	0.06032	0.06041	0.0605	0.0601	-0.15%
25-Apr-19	0.06041	0.05991	0.06048	0.05985	0.85%
24-Apr-19	0.05991	0.06012	0.0602	0.05981	-0.35%
23-Apr-19	0.06012	0.05995	0.06018	0.05975	0.28%
22-Apr-19	0.05995	0.05991	0.06002	0.05979	0.06%
21-Apr-19	0.05992	0.05991	0.05996	0.05991	0.00%
19-Apr-19	0.05992	0.05987	0.05996	0.05983	0.07%
18-Apr-19	0.05987	0.05972	0.06	0.05971	0.26%
17-Apr-19	0.05972	0.05995	0.06001	0.05967	-0.39%
16-Apr-19	0.05995	0.05993	0.05999	0.05988	0.04%
15-Apr-19	0.05993	0.05982	0.06012	0.05982	0.18%
14-Apr-19	0.05982	0.05985	0.05985	0.05979	-0.06%
12-Apr-19	0.05985	0.06021	0.06023	0.05982	-0.58%
11-Apr-19	0.06021	0.06051	0.06051	0.06016	-0.50%
10-Apr-19	0.06051	0.06041	0.06059	0.06034	0.16%
9-Apr-19	0.06041	0.06033	0.06047	0.06016	0.13%
8-Apr-19	0.06033	0.0602	0.06035	0.06008	0.22%
7-Apr-19	0.0602	0.06019	0.06023	0.06018	0.02%
5-Apr-19	0.06019	0.06017	0.06019	0.06001	0.03%
4-Apr-19	0.06017	0.06024	0.06035	0.06015	-0.12%
3-Apr-19	0.06024	0.06041	0.06044	0.06013	-0.27%
2-Apr-19	0.06041	0.06022	0.06045	0.06022	0.30%
1-Apr-19	0.06022	0.06048	0.06072	0.06022	-0.43%
31-Mar-19	0.06048	0.06043	0.06054	0.06042	-0.11%
29-Mar-19	0.06055	0.0609	0.06094	0.06049	-0.58%
28-Mar-19	0.0609	0.06088	0.06121	0.06082	0.04%
27-Mar-19	0.06088	0.06074	0.06099	0.0607	0.22%
26-Mar-19	0.06074	0.06096	0.06099	0.06067	-0.35%
25-Mar-19	0.06096	0.06083	0.06135	0.0608	0.21%
24-Mar-19	0.06083	0.06093	0.06093	0.06079	-0.46%
22-Mar-19	0.06111	0.06046	0.06121	0.06042	1.08%
21-Mar-19	0.06046	0.0605	0.06063	0.06029	-0.07%
20-Mar-19	0.0605	0.06025	0.06057	0.05999	0.42%
19-Mar-19	0.06025	0.06033	0.06041	0.0602	-0.14%
18-Mar-19	0.06033	0.06022	0.06034	0.06008	0.19%
17-Mar-19	0.06022	0.06026	0.06027	0.06022	0.00%
15-Mar-19	0.06022	0.06016	0.06026	0.05987	0.11%
14-Mar-19	0.06016	0.06032	0.06034	0.06012	-0.27%
13-Mar-19	0.06032	0.06027	0.06043	0.06011	0.09%
12-Mar-19	0.06027	0.06039	0.06043	0.06019	-0.20%
11-Mar-19	0.06039	0.06044	0.06057	0.06034	-0.08%
10-Mar-19	0.06044	0.06046	0.06047	0.06037	-0.09%
8-Mar-19	0.06049	0.06015	0.06065	0.06015	0.57%
7-Mar-19	0.06015	0.06012	0.06024	0.05999	0.05%
6-Mar-19	0.06012	0.05996	0.06014	0.05993	0.26%
5-Mar-19	0.05996	0.06	0.06002	0.05982	-0.06%
4-Mar-19	0.06	0.0599	0.06009	0.05977	0.18%
3-Mar-19	0.0599	0.05989	0.05998	0.05988	-0.03%
1-Mar-19	0.05991	0.06011	0.06023	0.05985	-0.32%
28-Feb-19	0.06011	0.06031	0.06045	0.06004	-0.34%
27-Feb-19	0.06031	0.0606	0.06063	0.0602	-0.47%
26-Feb-19	0.0606	0.06021	0.06066	0.06021	0.64%
25-Feb-19	0.06021	0.06061	0.06072	0.06012	-0.66%
24-Feb-19	0.06061	0.06071	0.06075	0.06061	-0.10%
22-Feb-19	0.06067	0.06068	0.06081	0.06057	-0.02%
21-Feb-19	0.06069	0.06067	0.06078	0.06041	0.02%
20-Feb-19	0.06067	0.06111	0.06111	0.06059	-0.71%
19-Feb-19	0.06111	0.06118	0.06135	0.06105	-0.12%
18-Feb-19	0.06118	0.06129	0.06133	0.06091	-0.17%
17-Feb-19	0.06129	0.06136	0.06138	0.06129	-0.04%
15-Feb-19	0.06131	0.06127	0.06149	0.06123	0.07%
14-Feb-19	0.06127	0.06093	0.06137	0.06085	0.56%
13-Feb-19	0.06093	0.0613	0.06132	0.06088	-0.60%
12-Feb-19	0.0613	0.06151	0.06156	0.06125	-0.35%
11-Feb-19	0.06151	0.06116	0.06167	0.06115	0.58%
10-Feb-19	0.06116	0.06122	0.06122	0.06115	-0.54%
8-Feb-19	0.06149	0.06145	0.06152	0.06137	0.07%
7-Feb-19	0.06145	0.06132	0.06154	0.06127	0.20%
6-Feb-19	0.06132	0.06133	0.06158	0.06131	-0.03%
5-Feb-19	0.06134	0.06133	0.06145	0.06129	0.01%
4-Feb-19	0.06133	0.06162	0.06162	0.06126	-0.48%
3-Feb-19	0.06162	0.06159	0.06163	0.06157	0.08%
1-Feb-19	0.06158	0.06157	0.06192	0.06149	0.02%
31-Jan-19	0.06157	0.06162	0.06186	0.06147	-0.09%
30-Jan-19	0.06162	0.06154	0.06173	0.0612	0.13%
29-Jan-19	0.06154	0.06172	0.06185	0.06148	-0.30%
28-Jan-19	0.06172	0.06167	0.06184	0.06156	0.09%
27-Jan-19	0.06167	0.06165	0.06167	0.06158	0.08%
25-Jan-19	0.06162	0.06193	0.06202	0.0614	-0.49%
24-Jan-19	0.06193	0.06203	0.06204	0.06185	-0.17%
23-Jan-19	0.06203	0.06225	0.06225	0.06173	-0.35%
22-Jan-19	0.06225	0.06198	0.06241	0.06182	0.43%
21-Jan-19	0.06198	0.06179	0.06207	0.06175	0.30%
20-Jan-19	0.06179	0.0618	0.06181	0.06175	0.03%
18-Jan-19	0.06178	0.06208	0.06209	0.0617	-0.48%
17-Jan-19	0.06208	0.06198	0.06231	0.06195	0.16%
16-Jan-19	0.06198	0.06222	0.06254	0.0619	-0.39%
15-Jan-19	0.06222	0.06252	0.06255	0.06207	-0.49%
14-Jan-19	0.06252	0.0624	0.06313	0.06237	0.19%
13-Jan-19	0.0624	0.06236	0.06243	0.06233	0.15%
11-Jan-19	0.06231	0.06268	0.06269	0.0622	-0.59%
10-Jan-19	0.06268	0.06297	0.06324	0.06255	-0.46%
9-Jan-19	0.06297	0.06297	0.06313	0.06267	0.00%
8-Jan-19	0.06297	0.06307	0.06319	0.06285	-0.15%
7-Jan-19	0.06307	0.06321	0.06341	0.06297	-0.22%
6-Jan-19	0.06321	0.06325	0.06331	0.06318	-0.15%
4-Jan-19	0.06331	0.06376	0.06389	0.06326	-0.71%
3-Jan-19	0.06376	0.06385	0.06444	0.06347	-0.15%
2-Jan-19	0.06385	0.06318	0.06523	0.06256	1.06%
1-Jan-19	0.06318	0.06257	0.06322	0.06244	0.98%
31-Dec-18	0.06257	0.06234	0.06276	0.06225	0.38%
30-Dec-18	0.06234	0.06239	0.06239	0.06229	0.00%
28-Dec-18	0.06234	0.06192	0.06244	0.06181	0.68%
27-Dec-18	0.06192	0.06224	0.06231	0.06177	-0.52%
26-Dec-18	0.06224	0.06242	0.06254	0.06222	-0.29%
25-Dec-18	0.06242	0.06253	0.06267	0.06237	-0.18%
24-Dec-18	0.06253	0.06218	0.0626	0.06208	0.56%
23-Dec-18	0.06218	0.06226	0.06226	0.06211	0.20%
21-Dec-18	0.06206	0.06192	0.06226	0.06181	0.22%
20-Dec-18	0.06192	0.0613	0.06211	0.06121	1.02%
19-Dec-18	0.0613	0.06127	0.0615	0.06116	0.04%
18-Dec-18	0.06127	0.06113	0.06143	0.06106	0.24%
17-Dec-18	0.06113	0.06091	0.06121	0.0608	0.36%
16-Dec-18	0.06091	0.06094	0.06095	0.0609	-0.12%
14-Dec-18	0.06098	0.06059	0.06101	0.06056	0.65%
13-Dec-18	0.06059	0.06074	0.06075	0.06051	-0.25%
12-Dec-18	0.06074	0.06085	0.06087	0.06059	-0.18%
11-Dec-18	0.06085	0.06107	0.06117	0.06079	-0.35%
10-Dec-18	0.06107	0.06105	0.0614	0.06075	0.04%
9-Dec-18	0.06105	0.06103	0.06108	0.06097	0.07%
7-Dec-18	0.061	0.06108	0.06113	0.06087	-0.14%
6-Dec-18	0.06108	0.06064	0.06132	0.06061	0.73%
5-Dec-18	0.06064	0.06067	0.06081	0.06054	-0.05%
4-Dec-18	0.06067	0.0606	0.06076	0.06039	0.11%
3-Dec-18	0.0606	0.06113	0.06126	0.06052	-0.86%
2-Dec-18	0.06113	0.06111	0.06122	0.06111	-0.34%
30-Nov-18	0.06134	0.06121	0.06135	0.06102	0.22%
29-Nov-18	0.06121	0.06124	0.06136	0.06112	-0.06%
28-Nov-18	0.06124	0.06109	0.0613	0.06099	0.25%
27-Nov-18	0.06109	0.06115	0.06141	0.06105	-0.10%
26-Nov-18	0.06115	0.06144	0.06144	0.06107	-0.47%
25-Nov-18	0.06144	0.06142	0.06148	0.0614	-0.12%
23-Nov-18	0.06151	0.06137	0.06167	0.06134	0.24%
22-Nov-18	0.06137	0.06129	0.06149	0.06123	0.13%
21-Nov-18	0.06129	0.06161	0.06175	0.0612	-0.53%
20-Nov-18	0.06161	0.06173	0.06181	0.06154	-0.19%
19-Nov-18	0.06173	0.0611	0.06175	0.06106	1.04%
18-Nov-18	0.0611	0.06105	0.06118	0.061	-0.67%
16-Nov-18	0.06151	0.06112	0.06158	0.06097	0.65%
15-Nov-18	0.06112	0.06124	0.06136	0.06101	-0.21%
14-Nov-18	0.06124	0.06115	0.06132	0.06081	0.14%
13-Nov-18	0.06115	0.06126	0.06133	0.06092	-0.18%
12-Nov-18	0.06126	0.06117	0.06126	0.06094	0.16%
11-Nov-18	0.06117	0.06119	0.0612	0.06114	0.01%
9-Nov-18	0.06116	0.06083	0.06121	0.06081	0.52%
8-Nov-18	0.06084	0.06094	0.0611	0.06078	-0.17%
7-Nov-18	0.06094	0.06103	0.06132	0.06087	-0.15%
6-Nov-18	0.06103	0.06116	0.06117	0.06093	-0.21%
5-Nov-18	0.06116	0.06084	0.06125	0.06077	0.52%
4-Nov-18	0.06084	0.06089	0.0609	0.06083	-0.09%
2-Nov-18	0.0609	0.06142	0.0615	0.0608	-0.84%
1-Nov-18	0.06142	0.06181	0.06187	0.06138	-0.64%
31-Oct-18	0.06181	0.06162	0.06183	0.06143	0.31%
30-Oct-18	0.06162	0.06197	0.06199	0.06158	-0.58%
29-Oct-18	0.06197	0.06185	0.06218	0.06178	0.20%
28-Oct-18	0.06185	0.06211	0.06212	0.06181	-0.33%
26-Oct-18	0.06205	0.06186	0.06234	0.06181	0.31%
25-Oct-18	0.06186	0.06199	0.0621	0.06167	-0.22%
24-Oct-18	0.06199	0.06171	0.06201	0.06157	0.46%
23-Oct-18	0.06171	0.06161	0.06197	0.06153	0.16%
22-Oct-18	0.06161	0.06164	0.06166	0.06124	-0.04%
21-Oct-18	0.06164	0.06154	0.06167	0.06154	0.07%
19-Oct-18	0.0616	0.06186	0.06209	0.06152	-0.42%
18-Oct-18	0.06186	0.06151	0.06196	0.06145	0.57%
17-Oct-18	0.06151	0.06152	0.06183	0.06144	-0.03%
16-Oct-18	0.06152	0.06186	0.06192	0.06151	-0.54%
15-Oct-18	0.06186	0.06175	0.06205	0.06175	0.17%
14-Oct-18	0.06175	0.06182	0.06182	0.06172	0.09%
12-Oct-18	0.06169	0.06147	0.06188	0.06131	0.37%
11-Oct-18	0.06147	0.06176	0.06186	0.06131	-0.47%
10-Oct-18	0.06176	0.06128	0.06179	0.06111	0.80%
9-Oct-18	0.06127	0.06128	0.06134	0.06086	0.00%
8-Oct-18	0.06128	0.06037	0.06144	0.06027	1.50%
7-Oct-18	0.06037	0.06032	0.0604	0.06031	-0.04%
5-Oct-18	0.0604	0.06029	0.0605	0.06021	0.18%
4-Oct-18	0.06029	0.06001	0.06043	0.05996	0.47%
3-Oct-18	0.06001	0.06048	0.06055	0.05995	-0.78%
2-Oct-18	0.06048	0.06029	0.06051	0.06025	0.32%
1-Oct-18	0.06029	0.06039	0.06039	0.06021	-0.17%
30-Sep-18	0.06039	0.06035	0.06043	0.06035	-0.03%
28-Sep-18	0.06041	0.06077	0.06097	0.0604	-0.59%
27-Sep-18	0.06077	0.06103	0.06112	0.06073	-0.43%
26-Sep-18	0.06103	0.06078	0.06107	0.06056	0.41%
25-Sep-18	0.06078	0.0608	0.06097	0.06065	-0.03%
24-Sep-18	0.0608	0.06081	0.06107	0.06067	-0.02%
23-Sep-18	0.06081	0.06089	0.06089	0.06079	-0.19%
21-Sep-18	0.06093	0.06086	0.06098	0.06054	0.12%
20-Sep-18	0.06086	0.06097	0.06114	0.06081	-0.18%
19-Sep-18	0.06097	0.06111	0.06115	0.06094	-0.22%
18-Sep-18	0.06111	0.06138	0.0615	0.06103	-0.45%
17-Sep-18	0.06138	0.06133	0.06147	0.06121	0.08%
16-Sep-18	0.06133	0.06129	0.06135	0.06127	0.07%
14-Sep-18	0.06129	0.0611	0.06139	0.06106	0.32%
13-Sep-18	0.0611	0.06169	0.06171	0.06108	-0.96%
12-Sep-18	0.06169	0.0616	0.06174	0.06153	0.14%
11-Sep-18	0.0616	0.0617	0.06174	0.06148	-0.16%
10-Sep-18	0.0617	0.06166	0.06193	0.06158	0.06%
9-Sep-18	0.06167	0.06166	0.06171	0.06159	0.05%
7-Sep-18	0.06163	0.06189	0.06192	0.06151	-0.41%
6-Sep-18	0.06189	0.06128	0.06189	0.06128	0.98%
5-Sep-18	0.06128	0.06139	0.06143	0.06109	-0.17%
4-Sep-18	0.06139	0.06142	0.06163	0.06125	-0.05%
3-Sep-18	0.06142	0.0615	0.06166	0.06139	-0.13%
2-Sep-18	0.0615	0.06153	0.06155	0.06148	0.00%
31-Aug-18	0.06151	0.06166	0.06177	0.06143	-0.24%
30-Aug-18	0.06166	0.06105	0.06172	0.06103	0.99%
29-Aug-18	0.06105	0.06121	0.06141	0.061	-0.26%
28-Aug-18	0.06121	0.06132	0.06136	0.06115	-0.17%
27-Aug-18	0.06132	0.06103	0.06151	0.06103	0.47%
26-Aug-18	0.06103	0.06118	0.06118	0.06101	-0.24%
24-Aug-18	0.06118	0.06177	0.06188	0.06117	-0.95%
23-Aug-18	0.06177	0.06187	0.06208	0.06173	-0.17%
22-Aug-18	0.06187	0.06217	0.06223	0.06184	-0.47%
21-Aug-18	0.06217	0.06235	0.06247	0.06195	-0.29%
20-Aug-18	0.06235	0.06227	0.0624	0.06188	0.12%
19-Aug-18	0.06227	0.0622	0.06227	0.0622	0.03%
17-Aug-18	0.06225	0.06207	0.06238	0.06195	0.37%
16-Aug-18	0.06202	0.06272	0.06277	0.06195	-1.12%
15-Aug-18	0.06272	0.0619	0.06279	0.06178	1.33%
14-Aug-18	0.0619	0.06226	0.06231	0.06181	-0.58%
13-Aug-18	0.06226	0.06198	0.06263	0.06198	0.46%
12-Aug-18	0.06198	0.06217	0.06217	0.06189	0.44%
10-Aug-18	0.06171	0.06138	0.06201	0.06137	0.54%
9-Aug-18	0.06138	0.06164	0.06176	0.06133	-0.43%
8-Aug-18	0.06164	0.06137	0.06166	0.06108	0.45%
7-Aug-18	0.06137	0.06156	0.06164	0.06125	-0.31%
6-Aug-18	0.06156	0.06144	0.06157	0.06139	0.20%
5-Aug-18	0.06144	0.0614	0.06145	0.06139	0.11%
3-Aug-18	0.06137	0.06127	0.06169	0.0612	0.16%
2-Aug-18	0.06127	0.06113	0.06147	0.06095	0.23%
1-Aug-18	0.06113	0.06094	0.06123	0.06064	0.31%
31-Jul-18	0.06094	0.06141	0.06154	0.06083	-0.76%
30-Jul-18	0.06141	0.0614	0.06154	0.06131	0.00%
29-Jul-18	0.06141	0.0614	0.06143	0.06137	0.07%
27-Jul-18	0.06137	0.06112	0.06156	0.06109	0.42%
26-Jul-18	0.06111	0.06112	0.06136	0.06081	0.07%
25-Jul-18	0.06106	0.06105	0.06116	0.06085	0.03%
24-Jul-18	0.06105	0.06093	0.06141	0.06075	0.19%
23-Jul-18	0.06093	0.06086	0.06119	0.06043	0.12%
22-Jul-18	0.06086	0.06074	0.06086	0.0607	0.16%
20-Jul-18	0.06076	0.06027	0.0608	0.06016	0.81%
19-Jul-18	0.06027	0.05956	0.06044	0.05954	1.18%
18-Jul-18	0.05957	0.05936	0.06014	0.05928	0.35%
17-Jul-18	0.05936	0.05953	0.05955	0.0593	-0.28%
16-Jul-18	0.05953	0.05956	0.05963	0.05934	-0.06%
15-Jul-18	0.05956	0.05959	0.05964	0.05952	0.06%
13-Jul-18	0.05953	0.05917	0.05992	0.05905	0.61%
12-Jul-18	0.05917	0.05968	0.05976	0.0591	-0.86%
11-Jul-18	0.05968	0.05983	0.06019	0.05959	-0.25%
10-Jul-18	0.05983	0.05963	0.06002	0.05939	0.34%
9-Jul-18	0.05963	0.06013	0.06013	0.05961	-0.84%
8-Jul-18	0.06013	0.06019	0.06019	0.0601	-0.03%
6-Jul-18	0.06015	0.06002	0.06022	0.05982	0.21%
5-Jul-18	0.06002	0.06002	0.06019	0.05991	0.00%
4-Jul-18	0.06002	0.06014	0.06022	0.05982	-0.20%
3-Jul-18	0.06014	0.06015	0.06062	0.05993	-0.01%
2-Jul-18	0.06015	0.05984	0.0605	0.05974	0.52%
1-Jul-18	0.05984	0.05984	0.05992	0.05982	0.00%
29-Jun-18	0.05984	0.05999	0.06009	0.0597	-0.25%
28-Jun-18	0.05999	0.05989	0.06018	0.05985	0.15%
27-Jun-18	0.0599	0.05975	0.06025	0.05964	0.24%
26-Jun-18	0.05975	0.05965	0.05999	0.05963	0.16%
25-Jun-18	0.05965	0.05917	0.05993	0.05917	0.81%
24-Jun-18	0.05917	0.0592	0.0592	0.05914	0.00%
22-Jun-18	0.05917	0.05906	0.05931	0.05895	0.19%
21-Jun-18	0.05906	0.05865	0.05919	0.05858	0.69%
20-Jun-18	0.05865	0.05894	0.05902	0.05861	-0.49%
19-Jun-18	0.05894	0.05847	0.05908	0.05831	0.82%
18-Jun-18	0.05846	0.05827	0.05852	0.05812	0.31%
17-Jun-18	0.05828	0.05827	0.05829	0.05819	0.16%
15-Jun-18	0.05818	0.05784	0.05828	0.05784	0.61%
14-Jun-18	0.05783	0.05804	0.05816	0.05777	-0.35%
13-Jun-18	0.05804	0.05797	0.05812	0.0577	0.11%
12-Jun-18	0.05797	0.05799	0.05816	0.05791	-0.04%
11-Jun-18	0.05799	0.05825	0.0585	0.05798	-0.44%
10-Jun-18	0.05825	0.05836	0.05836	0.05825	-0.42%
8-Jun-18	0.0585	0.05827	0.05871	0.05819	0.39%
7-Jun-18	0.05827	0.05801	0.05838	0.05796	0.46%
6-Jun-18	0.05801	0.0583	0.05833	0.05794	-0.51%
5-Jun-18	0.0583	0.05827	0.05853	0.05824	0.05%
4-Jun-18	0.05827	0.05867	0.05874	0.05826	-0.67%
3-Jun-18	0.05867	0.05878	0.05878	0.05867	0.07%
1-Jun-18	0.05863	0.0589	0.05895	0.05852	-0.55%
31-May-18	0.05895	0.05904	0.05915	0.05876	-0.14%
30-May-18	0.05904	0.0592	0.05929	0.05863	-0.25%
29-May-18	0.05919	0.0585	0.05935	0.0585	1.19%
28-May-18	0.0585	0.0581	0.05859	0.05793	0.66%
27-May-18	0.05811	0.05804	0.05815	0.058	-0.52%
25-May-18	0.05841	0.05834	0.05855	0.05816	0.13%
24-May-18	0.05834	0.05814	0.05853	0.05805	0.34%
23-May-18	0.05814	0.05748	0.05829	0.0574	1.16%
22-May-18	0.05748	0.0575	0.05756	0.05727	-0.03%
21-May-18	0.0575	0.05758	0.05765	0.05732	-0.15%
20-May-18	0.05758	0.05754	0.0576	0.05754	0.00%
18-May-18	0.05759	0.05745	0.05833	0.05737	0.24%
17-May-18	0.05745	0.05773	0.05776	0.05743	-0.49%
16-May-18	0.05773	0.05786	0.05803	0.0577	-0.23%
15-May-18	0.05786	0.05776	0.05809	0.05771	0.16%
14-May-18	0.05776	0.05804	0.05805	0.05774	-0.47%
13-May-18	0.05804	0.05808	0.05808	0.05805	0.19%
11-May-18	0.05793	0.05802	0.0581	0.05788	-0.16%
10-May-18	0.05802	0.05793	0.05812	0.05784	0.16%
9-May-18	0.05793	0.05843	0.05846	0.05794	-0.86%
8-May-18	0.05843	0.05844	0.05853	0.0583	-0.03%
7-May-18	0.05844	0.05826	0.05844	0.05824	0.32%
6-May-18	0.05826	0.05826	0.05826	0.05824	-0.15%
4-May-18	0.05835	0.05824	0.0585	0.05819	0.19%
3-May-18	0.05824	0.05793	0.05832	0.05789	0.54%
2-May-18	0.05793	0.05773	0.05825	0.05773	0.33%
1-May-18	0.05773	0.05793	0.05811	0.05771	-0.35%
30-Apr-18	0.05793	0.0581	0.05821	0.05785	-0.27%
29-Apr-18	0.05809	0.05812	0.05812	0.05809	0.03%
27-Apr-18	0.05807	0.05797	0.05813	0.05788	0.18%
26-Apr-18	0.05797	0.05785	0.05822	0.05779	0.22%
25-Apr-18	0.05785	0.05796	0.05804	0.05779	-0.19%
24-Apr-18	0.05796	0.05807	0.05841	0.05779	-0.21%
23-Apr-18	0.05807	0.05844	0.0585	0.05807	-0.63%
22-Apr-18	0.05844	0.05849	0.0585	0.05844	-0.12%
20-Apr-18	0.05852	0.05844	0.05861	0.05835	0.14%
19-Apr-18	0.05844	0.05845	0.05852	0.0583	-0.03%
18-Apr-18	0.05845	0.05869	0.05878	0.05844	-0.42%
17-Apr-18	0.05869	0.05863	0.05893	0.05863	0.11%
16-Apr-18	0.05863	0.05836	0.05877	0.05836	0.45%
15-Apr-18	0.05836	0.05835	0.05841	0.05833	-0.17%
13-Apr-18	0.05847	0.05867	0.05867	0.0583	-0.36%
12-Apr-18	0.05867	0.05869	0.05893	0.05859	-0.02%
11-Apr-18	0.05869	0.05866	0.05886	0.05858	0.05%
10-Apr-18	0.05866	0.05909	0.05911	0.05852	-0.73%
9-Apr-18	0.05909	0.05898	0.05911	0.05882	0.17%
8-Apr-18	0.05898	0.05892	0.059	0.05892	0.07%
6-Apr-18	0.05895	0.05886	0.05901	0.05869	0.14%
5-Apr-18	0.05886	0.05904	0.05906	0.05869	-0.30%
4-Apr-18	0.05904	0.05909	0.05945	0.059	-0.08%
3-Apr-18	0.05909	0.05935	0.05951	0.059	-0.45%
2-Apr-18	0.05935	0.05912	0.05935	0.05898	0.41%
1-Apr-18	0.05912	0.05908	0.05912	0.05903	-0.13%
30-Mar-18	0.05919	0.05906	0.05931	0.05904	0.21%
29-Mar-18	0.05906	0.05895	0.05927	0.05895	0.19%
28-Mar-18	0.05895	0.05956	0.05961	0.05889	-1.01%
27-Mar-18	0.05956	0.05946	0.05965	0.05908	0.15%
26-Mar-18	0.05946	0.06028	0.06031	0.05945	-1.36%
25-Mar-18	0.06028	0.06041	0.06041	0.06028	-0.04%
23-Mar-18	0.06031	0.06036	0.06045	0.06002	-0.09%
22-Mar-18	0.06036	0.05968	0.0605	0.05965	1.14%
21-Mar-18	0.05968	0.05948	0.05971	0.05932	0.34%
20-Mar-18	0.05948	0.05976	0.05976	0.05939	-0.46%
19-Mar-18	0.05976	0.05982	0.06021	0.05959	-0.10%
18-Mar-18	0.05982	0.05983	0.05985	0.05974	0.08%
16-Mar-18	0.05976	0.05946	0.05985	0.05948	0.50%
15-Mar-18	0.05946	0.05949	0.05971	0.05945	-0.07%
14-Mar-18	0.05951	0.05935	0.05951	0.05918	0.25%
13-Mar-18	0.05935	0.05957	0.05957	0.05899	-0.35%
12-Mar-18	0.05957	0.05923	0.05956	0.05918	0.57%
11-Mar-18	0.05923	0.05934	0.05931	0.0592	-0.15%
9-Mar-18	0.05931	0.0596	0.05965	0.05919	-0.50%
8-Mar-18	0.05962	0.05957	0.05981	0.05956	0.07%
7-Mar-18	0.05957	0.05979	0.05998	0.05957	-0.37%
6-Mar-18	0.05979	0.05976	0.05991	0.0594	0.05%
5-Mar-18	0.05976	0.06016	0.06016	0.05974	-0.66%
4-Mar-18	0.06016	0.06009	0.06026	0.05994	0.21%
2-Mar-18	0.06004	0.05989	0.06025	0.05979	0.24%
1-Mar-18	0.0599	0.05937	0.05991	0.05932	0.88%
28-Feb-18	0.05937	0.05884	0.05935	0.05875	0.91%
27-Feb-18	0.05884	0.05898	0.05935	0.05868	-0.25%
26-Feb-18	0.05898	0.05939	0.05955	0.05898	-0.68%
25-Feb-18	0.05939	0.05928	0.05941	0.05928	0.19%
23-Feb-18	0.05928	0.05948	0.05951	0.05924	-0.35%
22-Feb-18	0.05948	0.05901	0.05956	0.05895	0.80%
21-Feb-18	0.05901	0.05912	0.05911	0.0588	-0.19%
20-Feb-18	0.05912	0.05949	0.05951	0.05909	-0.62%
19-Feb-18	0.05949	0.05971	0.05992	0.05945	-0.35%
18-Feb-18	0.05971	0.05971	0.05971	0.05965	0.00%
16-Feb-18	0.05971	0.05984	0.06011	0.05949	-0.22%
15-Feb-18	0.05984	0.05957	0.05985	0.05939	0.45%
14-Feb-18	0.05957	0.05883	0.05962	0.05863	1.24%
13-Feb-18	0.05883	0.05821	0.05906	0.05816	1.07%
12-Feb-18	0.05821	0.05779	0.05835	0.05779	0.73%
11-Feb-18	0.05779	0.05777	0.05787	0.05779	0.02%
9-Feb-18	0.05779	0.0583	0.0583	0.05765	-0.89%
8-Feb-18	0.0583	0.05739	0.0583	0.05729	1.60%
7-Feb-18	0.05739	0.05732	0.05759	0.05708	0.11%
6-Feb-18	0.05732	0.05768	0.05807	0.05728	-0.62%
5-Feb-18	0.05768	0.05733	0.05771	0.05707	0.61%
4-Feb-18	0.05733	0.05729	0.05736	0.05729	0.18%
2-Feb-18	0.05723	0.05757	0.05762	0.05703	-0.61%
1-Feb-18	0.05757	0.05759	0.05765	0.05739	-0.02%
31-Jan-18	0.05759	0.05813	0.05825	0.05743	-0.95%
30-Jan-18	0.05813	0.05818	0.05837	0.05804	-0.07%
29-Jan-18	0.05818	0.05815	0.05835	0.05804	0.05%
28-Jan-18	0.05815	0.0581	0.05815	0.0581	0.04%
26-Jan-18	0.05812	0.05765	0.05843	0.05765	0.82%
25-Jan-18	0.05765	0.05827	0.05827	0.05765	-1.06%
24-Jan-18	0.05827	0.05816	0.05846	0.05804	0.17%
23-Jan-18	0.05816	0.05772	0.05816	0.05759	0.77%
22-Jan-18	0.05772	0.05768	0.05785	0.05764	0.06%
21-Jan-18	0.05768	0.05768	0.05771	0.05768	-0.22%
19-Jan-18	0.05782	0.05783	0.05802	0.0576	-0.03%
18-Jan-18	0.05783	0.05778	0.05799	0.05769	0.09%
17-Jan-18	0.05778	0.05838	0.0585	0.05778	-1.02%
16-Jan-18	0.05838	0.05821	0.05846	0.05794	0.27%
15-Jan-18	0.05822	0.05812	0.05835	0.05804	0.17%
14-Jan-18	0.05812	0.05812	0.05812	0.05804	0.02%
12-Jan-18	0.05811	0.05833	0.05847	0.05787	-0.37%
11-Jan-18	0.05833	0.05841	0.05852	0.05811	-0.15%
10-Jan-18	0.05841	0.05791	0.05846	0.05791	0.86%
9-Jan-18	0.05791	0.05743	0.05811	0.05738	0.84%
8-Jan-18	0.05743	0.05745	0.05756	0.05729	-0.02%
7-Jan-18	0.05745	0.05748	0.05751	0.05745	0.10%
5-Jan-18	0.05739	0.05757	0.05762	0.05729	-0.33%
4-Jan-18	0.05757	0.05776	0.05782	0.05754	-0.31%
3-Jan-18	0.05776	0.05785	0.05795	0.05773	-0.17%
2-Jan-18	0.05785	0.05782	0.05801	0.05763	0.06%
1-Jan-18	0.05782	0.0579	0.05793	0.0577	-0.14%
31-Dec-17	0.0579	0.0579	0.0579	0.0579	0.35%
29-Dec-17	0.0577	0.05787	0.05799	0.05765	-0.30%
28-Dec-17	0.05787	0.0579	0.05804	0.05772	-0.02%
27-Dec-17	0.05788	0.05782	0.05796	0.05774	0.12%
26-Dec-17	0.05782	0.05799	0.05812	0.05774	-0.29%
25-Dec-17	0.05799	0.05807	0.05811	0.05765	-0.14%
24-Dec-17	0.05807	0.05807	0.05813	0.05804	0.03%
22-Dec-17	0.05804	0.05816	0.05816	0.05794	-0.19%
21-Dec-17	0.05816	0.05811	0.05815	0.05787	0.07%
20-Dec-17	0.05812	0.05847	0.05847	0.05799	-0.62%
19-Dec-17	0.05847	0.05878	0.05881	0.05845	-0.51%
18-Dec-17	0.05878	0.05869	0.05886	0.05859	0.14%
17-Dec-17	0.05869	0.05868	0.05878	0.05869	0.00%
15-Dec-17	0.05869	0.05881	0.05895	0.05855	-0.20%
14-Dec-17	0.05881	0.05869	0.05895	0.05859	0.22%
13-Dec-17	0.05869	0.05832	0.05883	0.05832	0.63%
12-Dec-17	0.05832	0.0583	0.05835	0.05825	0.04%
11-Dec-17	0.05829	0.0583	0.05841	0.05819	0.00%
10-Dec-17	0.05829	0.0583	0.0583	0.05824	-0.05%
8-Dec-17	0.05832	0.05849	0.05855	0.0583	-0.29%
7-Dec-17	0.05849	0.05892	0.05892	0.05849	-0.73%
6-Dec-17	0.05892	0.05884	0.05906	0.05884	0.12%
5-Dec-17	0.05884	0.05884	0.05886	0.05864	0.00%
4-Dec-17	0.05884	0.0588	0.05887	0.05855	0.09%
3-Dec-17	0.0588	0.05878	0.05886	0.05874	-0.25%
1-Dec-17	0.05895	0.05875	0.0593	0.05864	0.34%
30-Nov-17	0.05875	0.05901	0.05916	0.05869	-0.46%
29-Nov-17	0.05901	0.05922	0.05928	0.059	-0.34%
28-Nov-17	0.05922	0.05934	0.05945	0.05925	-0.22%
27-Nov-17	0.05934	0.05858	0.05951	0.05859	1.30%
26-Nov-17	0.05858	0.05866	0.05866	0.05858	-1.01%
24-Nov-17	0.05918	0.05918	0.05932	0.05909	0.00%
23-Nov-17	0.05918	0.0594	0.05951	0.05912	-0.40%
22-Nov-17	0.05942	0.059	0.05946	0.05899	0.77%
21-Nov-17	0.05897	0.05895	0.05911	0.05895	0.03%
20-Nov-17	0.05895	0.05947	0.05951	0.05888	-0.88%
19-Nov-17	0.05947	0.05913	0.05958	0.05909	0.59%
17-Nov-17	0.05912	0.05864	0.0592	0.05858	0.81%
16-Nov-17	0.05864	0.05872	0.05875	0.05855	-0.12%
15-Nov-17	0.05872	0.05852	0.05881	0.05849	0.34%
14-Nov-17	0.05852	0.05846	0.05866	0.0583	0.10%
13-Nov-17	0.05846	0.05841	0.05861	0.05824	0.09%
12-Nov-17	0.05841	0.05852	0.0585	0.05844	-0.17%
10-Nov-17	0.0585	0.05855	0.05864	0.05845	-0.09%
9-Nov-17	0.05855	0.05818	0.0587	0.05815	0.65%
8-Nov-17	0.05818	0.05838	0.05846	0.05818	-0.34%
7-Nov-17	0.05838	0.05832	0.05835	0.058	0.10%
6-Nov-17	0.05832	0.05804	0.05835	0.05785	0.48%
5-Nov-17	0.05804	0.0581	0.05812	0.05804	-0.26%
3-Nov-17	0.05818	0.05796	0.05827	0.05794	0.38%
2-Nov-17	0.05796	0.05782	0.05816	0.05777	0.26%
1-Nov-17	0.05782	0.05838	0.05839	0.05779	-0.98%
31-Oct-17	0.05838	0.05879	0.05879	0.0583	-0.69%
30-Oct-17	0.05879	0.05855	0.05883	0.05844	0.41%
29-Oct-17	0.05855	0.05852	0.05861	0.05852	0.08%
27-Oct-17	0.0585	0.05819	0.0585	0.05815	0.53%
26-Oct-17	0.05819	0.05847	0.05896	0.05819	-0.46%
25-Oct-17	0.05847	0.05825	0.05851	0.05819	0.36%
24-Oct-17	0.05825	0.05858	0.05861	0.05819	-0.55%
23-Oct-17	0.05858	0.05821	0.05861	0.05819	0.62%
22-Oct-17	0.05821	0.05824	0.05825	0.05818	-0.21%
20-Oct-17	0.05833	0.05869	0.05872	0.05827	-0.61%
19-Oct-17	0.05869	0.05866	0.05891	0.05855	0.07%
18-Oct-17	0.05866	0.05901	0.05906	0.05865	-0.61%
17-Oct-17	0.05901	0.05873	0.05908	0.05869	0.49%
16-Oct-17	0.05873	0.05886	0.05906	0.05869	-0.21%
15-Oct-17	0.05886	0.05892	0.05892	0.05883	0.05%
13-Oct-17	0.05883	0.05869	0.05898	0.05863	0.22%
12-Oct-17	0.05869	0.05861	0.0587	0.0586	0.15%
11-Oct-17	0.05861	0.0585	0.05877	0.05844	0.18%
10-Oct-17	0.0585	0.05881	0.05883	0.05844	-0.52%
9-Oct-17	0.05881	0.05909	0.05909	0.05878	-0.47%
8-Oct-17	0.05909	0.05912	0.0592	0.05909	0.03%
6-Oct-17	0.05907	0.059	0.05906	0.05864	0.14%
5-Oct-17	0.05898	0.05897	0.05913	0.05889	0.02%
4-Oct-17	0.05897	0.05894	0.05926	0.05884	0.07%
3-Oct-17	0.05894	0.05901	0.059	0.05874	-0.14%
2-Oct-17	0.05901	0.05912	0.05912	0.05889	-0.17%
1-Oct-17	0.05912	0.05917	0.05928	0.05909	-0.05%
29-Sep-17	0.05914	0.05926	0.05937	0.05894	-0.19%
28-Sep-17	0.05926	0.05883	0.05935	0.05863	0.73%
27-Sep-17	0.05883	0.05909	0.05911	0.05864	-0.44%
26-Sep-17	0.05909	0.05925	0.05941	0.059	-0.27%
25-Sep-17	0.05925	0.05875	0.05936	0.05875	0.85%
24-Sep-17	0.05875	0.05903	0.05903	0.05874	-0.24%
22-Sep-17	0.05889	0.05861	0.05895	0.05858	0.47%
21-Sep-17	0.05861	0.05843	0.05877	0.05835	0.32%
20-Sep-17	0.05843	0.059	0.05912	0.05838	-1.00%
19-Sep-17	0.05901	0.05895	0.05915	0.05886	0.10%
18-Sep-17	0.05895	0.05892	0.05907	0.05884	0.07%
17-Sep-17	0.05892	0.05903	0.059	0.05889	-0.34%
15-Sep-17	0.05912	0.05962	0.05962	0.05879	-0.84%
14-Sep-17	0.05962	0.0592	0.05976	0.05907	0.69%
13-Sep-17	0.0592	0.05929	0.05941	0.05897	-0.12%
12-Sep-17	0.05928	0.0597	0.05986	0.05925	-0.75%
11-Sep-17	0.05973	0.06036	0.06036	0.05965	-1.06%
10-Sep-17	0.06036	0.06035	0.06035	0.06023	0.43%
8-Sep-17	0.0601	0.05988	0.06021	0.05965	0.38%
7-Sep-17	0.05988	0.05976	0.06006	0.05959	0.19%
6-Sep-17	0.05976	0.06021	0.0603	0.05965	-0.73%
5-Sep-17	0.06021	0.05946	0.06027	0.05949	1.25%
4-Sep-17	0.05946	0.05963	0.05982	0.0594	-0.29%
3-Sep-17	0.05963	0.05976	0.05976	0.05964	0.20%
1-Sep-17	0.05951	0.05984	0.05987	0.05945	-0.54%
31-Aug-17	0.05984	0.0597	0.05996	0.05955	0.24%
30-Aug-17	0.0597	0.06008	0.06024	0.05964	-0.65%
29-Aug-17	0.06008	0.06078	0.06092	0.06008	-1.14%
28-Aug-17	0.06078	0.06022	0.06101	0.06022	0.93%
27-Aug-17	0.06022	0.06032	0.06032	0.06019	-0.98%
25-Aug-17	0.06081	0.06083	0.06106	0.06064	-0.03%
24-Aug-17	0.06083	0.06114	0.06111	0.06069	-0.50%
23-Aug-17	0.06114	0.06072	0.06115	0.06063	0.68%
22-Aug-17	0.06072	0.06117	0.06117	0.06072	-0.74%
21-Aug-17	0.06117	0.06101	0.06135	0.06095	0.27%
20-Aug-17	0.06101	0.06099	0.06101	0.06099	-0.11%
18-Aug-17	0.06108	0.06107	0.06142	0.06089	0.02%
17-Aug-17	0.06107	0.06082	0.06106	0.06053	0.41%
16-Aug-17	0.06082	0.06044	0.06082	0.0603	0.62%
15-Aug-17	0.06044	0.06066	0.0607	0.06029	-0.47%
14-Aug-17	0.06073	0.061	0.061	0.06073	-0.52%
13-Aug-17	0.06104	0.06106	0.06106	0.06104	-0.02%
11-Aug-17	0.06106	0.06093	0.06126	0.06093	0.32%
10-Aug-17	0.06086	0.06063	0.06096	0.06054	0.38%
9-Aug-17	0.06063	0.06092	0.06095	0.06064	-0.39%
8-Aug-17	0.06086	0.06069	0.06123	0.06055	0.35%
7-Aug-17	0.06066	0.06106	0.06106	0.06064	-0.67%
6-Aug-17	0.06106	0.06111	0.06111	0.06104	0.45%
4-Aug-17	0.06079	0.06112	0.06111	0.06064	-0.44%
3-Aug-17	0.06106	0.06069	0.06112	0.06059	0.52%
2-Aug-17	0.06075	0.06081	0.06095	0.06064	-0.16%
1-Aug-17	0.06084	0.06094	0.06106	0.06083	-0.16%
31-Jul-17	0.06094	0.06098	0.06098	0.06073	-0.02%
30-Jul-17	0.06095	0.06089	0.06095	0.06089	0.13%
28-Jul-17	0.06087	0.06067	0.06086	0.06065	0.35%
27-Jul-17	0.06066	0.06078	0.06086	0.06035	-0.16%
26-Jul-17	0.06075	0.06026	0.06077	0.06024	0.68%
25-Jul-17	0.06035	0.06069	0.06086	0.06033	-0.65%
24-Jul-17	0.06074	0.06056	0.06103	0.06056	0.31%
23-Jul-17	0.06055	0.06055	0.06055	0.0605	-0.62%
21-Jul-17	0.06094	0.06041	0.06095	0.06033	0.81%
20-Jul-17	0.06044	0.06035	0.06056	0.06024	0.16%
19-Jul-17	0.06035	0.06024	0.06055	0.06024	0.23%
18-Jul-17	0.06021	0.06013	0.06036	0.05993	0.19%
17-Jul-17	0.0601	0.05997	0.06025	0.05988	0.23%
16-Jul-17	0.05996	0.05994	0.05995	0.05994	-0.49%
14-Jul-17	0.06025	0.05979	0.06035	0.05974	0.67%
13-Jul-17	0.05985	0.05989	0.06007	0.05977	-0.16%
12-Jul-17	0.05994	0.05978	0.06017	0.05979	0.33%
11-Jul-17	0.05975	0.05964	0.05977	0.05931	0.18%
10-Jul-17	0.05965	0.05968	0.05968	0.05953	-0.17%
9-Jul-17	0.05974	0.05976	0.05976	0.05974	0.00%
7-Jul-17	0.05974	0.06011	0.06012	0.05965	-0.52%
6-Jul-17	0.06006	0.06008	0.06016	0.05986	-0.04%
5-Jul-17	0.06008	0.0602	0.06021	0.05985	-0.12%
4-Jul-17	0.06016	0.05997	0.06016	0.05979	0.30%
3-Jul-17	0.05997	0.06038	0.06038	0.05984	-0.63%
2-Jul-17	0.06036	0.06049	0.06049	0.06034	0.12%
30-Jun-17	0.06028	0.06059	0.06066	0.06024	-0.44%
29-Jun-17	0.06055	0.06053	0.06067	0.06011	0.02%
28-Jun-17	0.06054	0.06072	0.06076	0.06055	-0.20%
27-Jun-17	0.06066	0.06115	0.06115	0.06055	-0.79%
26-Jun-17	0.06114	0.06143	0.06146	0.06114	-0.50%
25-Jun-17	0.06145	0.06141	0.06146	0.06141	0.03%
23-Jun-17	0.06143	0.06141	0.06146	0.06141	-0.02%
22-Jun-17	0.06144	0.06134	0.06156	0.06115	0.16%
21-Jun-17	0.06134	0.06133	0.06146	0.06114	0.00%
20-Jun-17	0.06134	0.06106	0.06136	0.06104	0.47%
19-Jun-17	0.06106	0.06133	0.06146	0.06103	-0.46%
18-Jun-17	0.06134	0.06134	0.06145	0.06134	-0.15%
16-Jun-17	0.06143	0.06138	0.06147	0.06109	0.08%
15-Jun-17	0.06138	0.06206	0.06206	0.06133	-1.10%
14-Jun-17	0.06206	0.06178	0.06227	0.06165	0.49%
13-Jun-17	0.06176	0.06185	0.06191	0.06165	-0.16%
12-Jun-17	0.06186	0.06152	0.06198	0.06149	0.66%
11-Jun-17	0.06146	0.06146	0.06146	0.06145	-0.32%
9-Jun-17	0.06165	0.06189	0.06189	0.06132	-0.34%
8-Jun-17	0.06186	0.06186	0.06206	0.06165	0.00%
7-Jun-17	0.06186	0.06207	0.06226	0.06154	-0.45%
6-Jun-17	0.06214	0.06164	0.06221	0.06144	0.79%
5-Jun-17	0.06165	0.06169	0.06169	0.06125	-0.02%
4-Jun-17	0.06166	0.06177	0.06177	0.06165	0.00%
2-Jun-17	0.06166	0.0611	0.06169	0.06099	0.85%
1-Jun-17	0.06114	0.06149	0.06149	0.06113	-0.52%
31-May-17	0.06146	0.06186	0.06186	0.06143	-0.65%
30-May-17	0.06186	0.06167	0.06196	0.06163	0.31%
29-May-17	0.06167	0.06165	0.06166	0.06154	0.03%
28-May-17	0.06165	0.06166	0.06166	0.06165	0.02%
26-May-17	0.06164	0.06147	0.06186	0.06131	0.29%
25-May-17	0.06146	0.06178	0.06178	0.06144	-0.50%
24-May-17	0.06177	0.06155	0.06177	0.06154	0.36%
23-May-17	0.06155	0.06209	0.06209	0.06155	-0.82%
22-May-17	0.06206	0.06159	0.06205	0.06158	0.68%
21-May-17	0.06164	0.06176	0.06176	0.06165	-0.45%
19-May-17	0.06192	0.06184	0.062	0.06174	0.13%
18-May-17	0.06184	0.06193	0.06246	0.06174	-0.16%
17-May-17	0.06194	0.06113	0.06221	0.06113	1.44%
16-May-17	0.06106	0.06067	0.06106	0.06052	0.64%
15-May-17	0.06067	0.06094	0.06094	0.06059	-0.45%
14-May-17	0.06095	0.06097	0.06097	0.06094	0.14%
12-May-17	0.06086	0.06067	0.06086	0.06061	0.33%
11-May-17	0.06066	0.06038	0.06076	0.06038	0.35%
10-May-17	0.06045	0.06075	0.06075	0.06038	-0.51%
9-May-17	0.06076	0.06098	0.06098	0.06043	-0.31%
8-May-17	0.06095	0.06111	0.06146	0.06094	-0.22%
7-May-17	0.06109	0.06064	0.06109	0.06064	-0.27%
5-May-17	0.06125	0.06128	0.06146	0.06125	-0.05%
4-May-17	0.06128	0.06117	0.06137	0.061	0.18%
3-May-17	0.06117	0.06157	0.06157	0.06115	-0.63%
2-May-17	0.06156	0.06165	0.06179	0.06145	-0.15%
1-May-17	0.06165	0.06211	0.06211	0.06154	-0.77%
30-Apr-17	0.06213	0.06204	0.06215	0.06204	0.47%
28-Apr-17	0.06184	0.06201	0.06213	0.06174	-0.32%
27-Apr-17	0.06204	0.06199	0.06213	0.06174	0.00%
26-Apr-17	0.06205	0.06199	0.06216	0.06169	0.10%
25-Apr-17	0.06199	0.06279	0.06279	0.06169	-1.23%
24-Apr-17	0.06276	0.06177	0.06281	0.06143	1.59%
23-Apr-17	0.06177	0.06115	0.06177	0.06115	-2.09%
21-Apr-17	0.0631	0.06291	0.06316	0.06291	0.25%
20-Apr-17	0.06294	0.06328	0.06328	0.06294	-0.52%
19-Apr-17	0.06327	0.0634	0.06346	0.06314	-0.28%
18-Apr-17	0.06345	0.06295	0.06347	0.06287	0.78%
17-Apr-17	0.06295	0.06363	0.06363	0.06295	-1.08%
16-Apr-17	0.06364	0.06335	0.06365	0.06335	1.04%
14-Apr-17	0.06299	0.06312	0.06345	0.06299	-0.21%
13-Apr-17	0.06312	0.06329	0.06336	0.063	-0.22%
12-Apr-17	0.06327	0.06289	0.06329	0.06274	0.65%
11-Apr-17	0.06285	0.06236	0.06291	0.06225	0.80%
10-Apr-17	0.06236	0.06208	0.06236	0.06196	0.47%
9-Apr-17	0.06207	0.06216	0.06216	0.06205	-0.16%
7-Apr-17	0.06216	0.06219	0.06256	0.06205	-0.13%
6-Apr-17	0.06225	0.06245	0.06245	0.06208	-0.34%
5-Apr-17	0.06245	0.06211	0.06245	0.06188	0.50%
4-Apr-17	0.06214	0.06219	0.06245	0.06213	-0.02%
3-Apr-17	0.06216	0.06185	0.06216	0.06174	0.57%
2-Apr-17	0.0618	0.0618	0.0618	0.0618	-0.09%
31-Mar-17	0.06185	0.06164	0.06186	0.06143	0.33%
30-Mar-17	0.06165	0.062	0.06216	0.06154	-0.64%
29-Mar-17	0.06205	0.06185	0.06221	0.06185	0.32%
28-Mar-17	0.06185	0.06204	0.06236	0.06185	-0.32%
27-Mar-17	0.06205	0.062	0.06246	0.062	0.00%
26-Mar-17	0.06204	0.06184	0.06205	0.06184	0.20%
24-Mar-17	0.06191	0.06203	0.06216	0.06182	-0.21%
23-Mar-17	0.06205	0.06179	0.06216	0.06171	0.32%
22-Mar-17	0.06185	0.06174	0.06216	0.06165	0.18%
21-Mar-17	0.06174	0.06136	0.06179	0.06114	0.54%
20-Mar-17	0.0614	0.06128	0.0614	0.06095	0.23%
19-Mar-17	0.06126	0.06131	0.06131	0.06125	0.02%
17-Mar-17	0.06125	0.06085	0.06126	0.06085	0.65%
16-Mar-17	0.06086	0.06097	0.06106	0.06079	-0.16%
15-Mar-17	0.06095	0.0603	0.06112	0.06025	1.11%
14-Mar-17	0.06028	0.06017	0.06036	0.06004	0.19%
13-Mar-17	0.06016	0.05976	0.06036	0.05974	0.66%
12-Mar-17	0.05977	0.05983	0.05983	0.05975	-0.80%
10-Mar-17	0.06025	0.06001	0.06026	0.05985	0.37%
9-Mar-17	0.06003	0.06042	0.06046	0.06003	-0.68%
8-Mar-17	0.06044	0.06059	0.06066	0.06032	-0.18%
7-Mar-17	0.06055	0.06054	0.06066	0.06035	0.00%
6-Mar-17	0.06055	0.06058	0.06066	0.06015	-0.02%
5-Mar-17	0.06055	0.06061	0.06061	0.06055	0.13%
3-Mar-17	0.06047	0.06024	0.06055	0.06015	0.37%
2-Mar-17	0.06025	0.0603	0.06045	0.06014	-0.16%
1-Mar-17	0.06035	0.06074	0.06086	0.06034	-0.65%
28-Feb-17	0.06074	0.06095	0.06146	0.06074	-0.34%
27-Feb-17	0.06095	0.06152	0.06155	0.06095	-0.87%
26-Feb-17	0.06148	0.06148	0.06148	0.06143	0.42%
24-Feb-17	0.06123	0.06093	0.06137	0.06074	0.46%
23-Feb-17	0.06095	0.06061	0.06103	0.06061	0.51%
22-Feb-17	0.06064	0.06055	0.06086	0.06055	0.14%
21-Feb-17	0.06055	0.06072	0.06085	0.06054	-0.30%
20-Feb-17	0.06073	0.06072	0.06086	0.06065	0.00%
19-Feb-17	0.06073	0.06084	0.06084	0.06075	-0.17%
17-Feb-17	0.06084	0.06049	0.06095	0.06032	0.48%
16-Feb-17	0.06055	0.06019	0.06056	0.06019	0.64%
15-Feb-17	0.06016	0.06007	0.06028	0.05982	0.16%
14-Feb-17	0.06007	0.0605	0.06066	0.06005	-0.78%
13-Feb-17	0.06053	0.06051	0.06055	0.06033	-0.02%
12-Feb-17	0.06055	0.06067	0.06067	0.06055	-0.19%
10-Feb-17	0.06066	0.06058	0.06077	0.06039	0.05%
9-Feb-17	0.06063	0.0614	0.0614	0.06064	-1.33%
8-Feb-17	0.06145	0.06126	0.06155	0.06125	0.30%
7-Feb-17	0.06126	0.06139	0.06156	0.06125	-0.21%
6-Feb-17	0.06139	0.06098	0.06147	0.06064	0.56%
5-Feb-17	0.06105	0.06103	0.06106	0.06103	0.16%
3-Feb-17	0.06095	0.06101	0.06115	0.06069	-0.12%
2-Feb-17	0.06103	0.06074	0.06137	0.06074	0.49%
1-Feb-17	0.06073	0.06102	0.06102	0.06044	-0.50%
31-Jan-17	0.06103	0.06053	0.06136	0.06043	0.91%
30-Jan-17	0.06049	0.05969	0.06058	0.05965	1.38%
29-Jan-17	0.05966	0.05962	0.05965	0.05962	-0.21%
27-Jan-17	0.05979	0.0601	0.06011	0.05964	-0.46%
26-Jan-17	0.06006	0.06075	0.06075	0.05994	-1.13%
25-Jan-17	0.06075	0.06024	0.06088	0.06014	0.84%
24-Jan-17	0.06024	0.06078	0.06078	0.06008	-0.96%
23-Jan-17	0.06083	0.06037	0.06086	0.0598	0.76%
22-Jan-17	0.06036	0.06015	0.06035	0.06015	0.57%
20-Jan-17	0.06002	0.05974	0.06016	0.05962	0.48%
19-Jan-17	0.05974	0.05962	0.05996	0.05944	0.17%
18-Jan-17	0.05964	0.06073	0.06076	0.05963	-1.79%
17-Jan-17	0.06072	0.06046	0.06086	0.06028	0.44%
16-Jan-17	0.06046	0.06044	0.0607	0.06027	0.04%
15-Jan-17	0.06044	0.0605	0.0605	0.06033	0.27%
13-Jan-17	0.06027	0.06009	0.06035	0.05984	0.35%
12-Jan-17	0.06006	0.06027	0.06056	0.06004	-0.38%
11-Jan-17	0.06029	0.05974	0.06067	0.05944	0.94%
10-Jan-17	0.05973	0.05981	0.0601	0.05954	-0.19%
9-Jan-17	0.05985	0.05892	0.05997	0.05884	1.53%
8-Jan-17	0.05895	0.05899	0.05899	0.05895	-0.38%
6-Jan-17	0.05917	0.05976	0.05976	0.05901	-0.98%
5-Jan-17	0.05976	0.05916	0.05986	0.05903	1.01%
4-Jan-17	0.05916	0.05917	0.05922	0.05875	0.00%
3-Jan-17	0.05916	0.05909	0.05928	0.05872	0.03%
2-Jan-17	0.05914	0.05958	0.05959	0.05904	-0.71%
1-Jan-17	0.05956	0.05957	0.05957	0.05954	0.30%
30-Dec-16	0.05938	0.05985	0.05985	0.05933	-0.79%
29-Dec-16	0.05985	0.05945	0.05997	0.05935	0.67%
28-Dec-16	0.05945	0.05915	0.05948	0.059	0.52%
27-Dec-16	0.05914	0.05928	0.05928	0.05914	-0.28%
26-Dec-16	0.05931	0.05922	0.05938	0.05922	0.10%
25-Dec-16	0.05925	0.05922	0.05926	0.05922	0.06%
23-Dec-16	0.05922	0.05914	0.05926	0.05914	0.13%
22-Dec-16	0.05914	0.05902	0.05926	0.05891	0.17%
21-Dec-16	0.05904	0.05894	0.05926	0.05894	0.17%
20-Dec-16	0.05894	0.05941	0.05941	0.05885	-0.71%
19-Dec-16	0.05936	0.05901	0.05965	0.05901	0.67%
18-Dec-16	0.05897	0.05897	0.05897	0.05894	-0.13%
16-Dec-16	0.05904	0.05873	0.05918	0.0587	0.53%
15-Dec-16	0.05873	0.05892	0.05918	0.05847	-0.35%
14-Dec-16	0.05894	0.0599	0.0601	0.05885	-1.66%
13-Dec-16	0.05993	0.06006	0.06016	0.05984	-0.35%
12-Dec-16	0.06014	0.05991	0.06016	0.05963	0.33%
11-Dec-16	0.05994	0.06001	0.06001	0.05993	0.03%
9-Dec-16	0.05993	0.06028	0.06037	0.0599	-0.68%
8-Dec-16	0.06034	0.06046	0.06075	0.06011	-0.33%
7-Dec-16	0.06054	0.06034	0.06066	0.06015	0.32%
6-Dec-16	0.06035	0.0657	0.06588	0.06019	-8.09%
5-Dec-16	0.06566	0.06098	0.06585	0.06002	7.66%
4-Dec-16	0.06098	0.0608	0.06167	0.0608	0.52%
2-Dec-16	0.06067	0.06046	0.0607	0.06033	0.36%
1-Dec-16	0.06045	0.06002	0.06055	0.06002	0.68%
30-Nov-16	0.06005	0.06132	0.06148	0.06005	-2.06%
29-Nov-16	0.06131	0.06185	0.06185	0.06093	-0.89%
28-Nov-16	0.06185	0.06125	0.06185	0.06125	0.99%
27-Nov-16	0.06125	0.06115	0.06127	0.06115	0.12%
25-Nov-16	0.06117	0.06108	0.06139	0.06075	0.15%
24-Nov-16	0.06109	0.06146	0.06146	0.06103	-0.60%
23-Nov-16	0.06146	0.06208	0.06216	0.06134	-0.97%
22-Nov-16	0.06205	0.06225	0.06247	0.06194	-0.31%
21-Nov-16	0.06225	0.06211	0.06236	0.06194	0.31%
20-Nov-16	0.06205	0.06205	0.06205	0.06204	-0.14%
18-Nov-16	0.06214	0.06239	0.06267	0.06214	-0.35%
17-Nov-16	0.06236	0.06242	0.06306	0.06218	-0.13%
16-Nov-16	0.06244	0.06289	0.06339	0.06233	-0.65%
15-Nov-16	0.06285	0.06329	0.06346	0.06273	-0.65%
14-Nov-16	0.06327	0.06397	0.06397	0.06314	-1.09%
13-Nov-16	0.06397	0.06391	0.06396	0.06391	0.08%
11-Nov-16	0.06391	0.06365	0.06415	0.06364	0.41%
10-Nov-16	0.06365	0.06403	0.06456	0.06359	-0.62%
9-Nov-16	0.06405	0.06463	0.06675	0.06405	-0.85%
8-Nov-16	0.0646	0.06485	0.06497	0.06454	-0.39%
7-Nov-16	0.06485	0.06509	0.06527	0.06475	-0.41%
6-Nov-16	0.06511	0.06539	0.06547	0.06504	-0.66%
4-Nov-16	0.06555	0.06566	0.06575	0.06543	-0.30%
3-Nov-16	0.06574	0.06536	0.06588	0.06534	0.59%
2-Nov-16	0.06536	0.06501	0.06545	0.06493	0.47%
1-Nov-16	0.06505	0.06464	0.06517	0.06444	0.64%
31-Oct-16	0.06464	0.06448	0.06478	0.06434	0.28%
30-Oct-16	0.06446	0.06451	0.06451	0.06444	-0.33%
28-Oct-16	0.06467	0.06448	0.06477	0.06435	0.32%
27-Oct-16	0.06447	0.06476	0.06486	0.06444	-0.44%
26-Oct-16	0.06475	0.06512	0.06515	0.06474	-0.60%
25-Oct-16	0.06514	0.06496	0.06515	0.06474	0.28%
24-Oct-16	0.06496	0.06512	0.06526	0.06494	-0.28%
23-Oct-16	0.06514	0.06513	0.06515	0.06513	0.02%
21-Oct-16	0.06513	0.06478	0.06526	0.06478	0.44%
20-Oct-16	0.06485	0.06515	0.06515	0.06485	-0.47%
19-Oct-16	0.06515	0.06493	0.06526	0.06487	0.39%
18-Oct-16	0.06489	0.06484	0.06496	0.06475	0.07%
17-Oct-16	0.06485	0.0647	0.0649	0.06455	0.29%
16-Oct-16	0.06466	0.0645	0.06466	0.0645	0.11%
14-Oct-16	0.06459	0.06487	0.06487	0.06436	-0.52%
13-Oct-16	0.06493	0.06442	0.06506	0.06425	0.79%
12-Oct-16	0.06442	0.06506	0.06506	0.06434	-0.98%
11-Oct-16	0.06506	0.06469	0.06516	0.06454	0.49%
10-Oct-16	0.06475	0.06481	0.06509	0.06464	-0.02%
9-Oct-16	0.06476	0.06475	0.06476	0.06475	-0.02%
7-Oct-16	0.06477	0.0643	0.06487	0.06424	0.75%
6-Oct-16	0.06429	0.06449	0.06467	0.06414	-0.30%
5-Oct-16	0.06448	0.06483	0.06497	0.06442	-0.56%
4-Oct-16	0.06484	0.06554	0.06574	0.0647	-1.06%
3-Oct-16	0.06554	0.06536	0.06596	0.06536	0.15%
2-Oct-16	0.06544	0.06556	0.06556	0.06544	-0.56%
30-Sep-16	0.06581	0.06591	0.06622	0.06565	-0.20%
29-Sep-16	0.06594	0.06613	0.06611	0.06551	-0.30%
28-Sep-16	0.06615	0.0664	0.06656	0.06614	-0.44%
27-Sep-16	0.06644	0.06644	0.06657	0.06605	0.00%
26-Sep-16	0.06644	0.066	0.06647	0.06594	0.74%
25-Sep-16	0.06595	0.06593	0.06598	0.06593	-0.16%
23-Sep-16	0.06605	0.0661	0.06616	0.06593	-0.04%
22-Sep-16	0.06608	0.06647	0.06662	0.06603	-0.59%
21-Sep-16	0.06647	0.06568	0.06646	0.06492	1.24%
20-Sep-16	0.06566	0.06547	0.06566	0.06534	0.30%
19-Sep-16	0.06546	0.06522	0.06586	0.06522	0.47%
18-Sep-16	0.06515	0.06536	0.06536	0.06515	-0.13%
16-Sep-16	0.06524	0.06541	0.06572	0.06514	-0.25%
15-Sep-16	0.0654	0.06508	0.0655	0.06504	0.52%
14-Sep-16	0.06506	0.06516	0.06526	0.06454	-0.15%
13-Sep-16	0.06516	0.06565	0.06575	0.06504	-0.62%
12-Sep-16	0.06556	0.06521	0.0657	0.06504	0.52%
11-Sep-16	0.06522	0.06514	0.06526	0.06514	0.12%
9-Sep-16	0.06515	0.06514	0.06545	0.06494	0.00%
8-Sep-16	0.06515	0.06543	0.0657	0.06504	-0.43%
7-Sep-16	0.06543	0.06577	0.06577	0.06544	-0.50%
6-Sep-16	0.06576	0.06448	0.06585	0.06444	1.88%
5-Sep-16	0.06454	0.06427	0.06476	0.06427	0.44%
4-Sep-16	0.06425	0.06418	0.06429	0.06418	0.00%
2-Sep-16	0.06426	0.06459	0.06492	0.06409	-0.60%
1-Sep-16	0.06464	0.06465	0.06475	0.06424	0.00%
31-Aug-16	0.06465	0.06504	0.06504	0.06454	-0.59%
30-Aug-16	0.06504	0.0656	0.0656	0.06482	-0.86%
29-Aug-16	0.0656	0.0658	0.0658	0.0652	-0.30%
28-Aug-16	0.0658	0.0658	0.0658	0.0657	0.46%
26-Aug-16	0.0655	0.0662	0.0667	0.0655	-1.06%
25-Aug-16	0.0662	0.0662	0.0663	0.0661	0.00%
24-Aug-16	0.0662	0.0662	0.0665	0.0661	0.00%
23-Aug-16	0.0662	0.0663	0.0666	0.0662	-0.15%
22-Aug-16	0.0663	0.066	0.0664	0.066	0.45%
21-Aug-16	0.066	0.0658	0.0661	0.0658	-0.60%
19-Aug-16	0.0664	0.066	0.0665	0.066	0.61%
18-Aug-16	0.066	0.0664	0.0666	0.066	-0.60%
17-Aug-16	0.0664	0.0661	0.0665	0.0656	0.45%
16-Aug-16	0.0661	0.0655	0.0664	0.0655	0.92%
15-Aug-16	0.0655	0.0656	0.0658	0.0655	-0.15%
14-Aug-16	0.0656	0.0657	0.0657	0.0656	0.15%
12-Aug-16	0.0655	0.0651	0.0658	0.0648	0.61%
11-Aug-16	0.0651	0.0656	0.0658	0.0649	-0.76%
10-Aug-16	0.0656	0.0653	0.0657	0.0653	0.46%
9-Aug-16	0.0653	0.0651	0.0654	0.065	0.31%
8-Aug-16	0.0651	0.0654	0.0655	0.0649	-0.46%
7-Aug-16	0.0654	0.0655	0.0655	0.0653	0.15%
5-Aug-16	0.0653	0.0656	0.0659	0.0652	-0.46%
4-Aug-16	0.0656	0.0654	0.0658	0.0653	0.31%
3-Aug-16	0.0654	0.0656	0.0658	0.0653	-0.30%
2-Aug-16	0.0656	0.0649	0.0658	0.0647	1.08%
1-Aug-16	0.0649	0.0649	0.0651	0.0644	0.00%
31-Jul-16	0.0649	0.0649	0.0651	0.0648	-0.15%
29-Jul-16	0.065	0.0635	0.0651	0.0635	2.36%
28-Jul-16	0.0635	0.0636	0.0638	0.0631	-0.16%
27-Jul-16	0.0636	0.0636	0.0638	0.0626	0.00%
26-Jul-16	0.0636	0.0633	0.0642	0.0632	0.47%
25-Jul-16	0.0633	0.063	0.0633	0.0628	0.48%
24-Jul-16	0.063	0.0631	0.0631	0.0629	0.16%
22-Jul-16	0.0629	0.0631	0.0632	0.0628	-0.32%
21-Jul-16	0.0631	0.0623	0.0633	0.0621	1.28%
20-Jul-16	0.0623	0.0631	0.0633	0.0622	-1.27%
19-Jul-16	0.0631	0.0632	0.0634	0.0628	-0.16%
18-Jul-16	0.0632	0.0633	0.0637	0.063	-0.16%
17-Jul-16	0.0633	0.0634	0.0634	0.063	-0.78%
15-Jul-16	0.0638	0.0636	0.0639	0.0629	0.31%
14-Jul-16	0.0636	0.0642	0.0643	0.0631	-0.93%
13-Jul-16	0.0642	0.0639	0.0643	0.0638	0.47%
12-Jul-16	0.0639	0.0653	0.0653	0.0637	-2.14%
11-Jul-16	0.0653	0.0665	0.0665	0.0651	-1.80%
10-Jul-16	0.0665	0.0665	0.0665	0.0664	0.00%
8-Jul-16	0.0665	0.0663	0.0669	0.0661	0.30%
7-Jul-16	0.0663	0.0662	0.0664	0.0659	0.15%
6-Jul-16	0.0662	0.066	0.0667	0.0658	0.30%
5-Jul-16	0.066	0.065	0.0661	0.065	1.54%
4-Jul-16	0.065	0.0648	0.0651	0.0646	0.31%
3-Jul-16	0.0648	0.0647	0.0648	0.0647	-0.15%
1-Jul-16	0.0649	0.0646	0.065	0.0645	0.46%
30-Jun-16	0.0646	0.0646	0.065	0.0643	0.00%
29-Jun-16	0.0646	0.0648	0.0651	0.0644	-0.31%
28-Jun-16	0.0648	0.0653	0.0655	0.0646	-0.77%
27-Jun-16	0.0653	0.0645	0.0659	0.0643	1.24%
26-Jun-16	0.0645	0.065	0.065	0.0642	-0.46%
24-Jun-16	0.0648	0.0627	0.0659	0.0623	3.35%
23-Jun-16	0.0627	0.0629	0.0631	0.0616	-0.32%
22-Jun-16	0.0629	0.0629	0.0632	0.0625	0.00%
21-Jun-16	0.0629	0.0633	0.0635	0.0627	-0.63%
20-Jun-16	0.0633	0.0624	0.0634	0.0622	1.44%
19-Jun-16	0.0624	0.0626	0.0628	0.0623	-1.42%
17-Jun-16	0.0633	0.0629	0.0633	0.0629	0.64%
16-Jun-16	0.0629	0.0622	0.0635	0.0621	1.13%
15-Jun-16	0.0622	0.0622	0.0624	0.0619	0.00%
14-Jun-16	0.0622	0.062	0.0624	0.0618	0.32%
13-Jun-16	0.062	0.0617	0.0623	0.0616	0.49%
12-Jun-16	0.0617	0.0614	0.0617	0.0614	0.49%
10-Jun-16	0.0614	0.0613	0.0616	0.0612	0.16%
9-Jun-16	0.0613	0.0615	0.0618	0.0612	-0.33%
8-Jun-16	0.0615	0.0613	0.0616	0.0612	0.33%
7-Jun-16	0.0613	0.061	0.0613	0.0609	0.49%
6-Jun-16	0.061	0.0616	0.0617	0.061	-0.97%
5-Jun-16	0.0616	0.0617	0.0618	0.0616	0.00%
3-Jun-16	0.0616	0.0605	0.0616	0.0603	1.82%
2-Jun-16	0.0605	0.06	0.0607	0.06	0.83%
1-Jun-16	0.06	0.0595	0.0603	0.0594	0.84%
31-May-16	0.0595	0.0594	0.0596	0.0591	0.17%
30-May-16	0.0594	0.0593	0.0595	0.0591	0.17%
29-May-16	0.0593	0.0595	0.0595	0.0593	-0.34%
27-May-16	0.0595	0.0597	0.0599	0.0594	-0.34%
26-May-16	0.0597	0.0595	0.0599	0.0595	0.34%
25-May-16	0.0595	0.0595	0.0597	0.0594	0.00%
24-May-16	0.0595	0.0599	0.06	0.0595	-0.67%
23-May-16	0.0599	0.0595	0.0601	0.0595	0.67%
22-May-16	0.0595	0.0595	0.0595	0.0594	0.17%
20-May-16	0.0594	0.0596	0.0596	0.0592	-0.34%
19-May-16	0.0596	0.0593	0.0597	0.0593	0.51%
18-May-16	0.0593	0.0598	0.0599	0.0593	-0.84%
17-May-16	0.0598	0.0598	0.0599	0.0595	0.00%
16-May-16	0.0598	0.0601	0.0602	0.0598	-0.50%
15-May-16	0.0601	0.0601	0.0602	0.0601	0.00%
13-May-16	0.0601	0.0597	0.0602	0.0596	0.67%
12-May-16	0.0597	0.0599	0.06	0.0594	-0.33%
11-May-16	0.0599	0.0597	0.06	0.0597	0.34%
10-May-16	0.0597	0.0602	0.0602	0.0596	-0.83%
9-May-16	0.0602	0.0606	0.0607	0.06	-0.66%
8-May-16	0.0606	0.0608	0.0608	0.0606	-0.16%
6-May-16	0.0607	0.0606	0.0611	0.0606	0.17%
5-May-16	0.0606	0.0607	0.0609	0.0605	-0.16%
4-May-16	0.0607	0.0609	0.0611	0.0606	-0.33%
3-May-16	0.0609	0.0608	0.0613	0.0605	0.16%
2-May-16	0.0608	0.0608	0.0609	0.0602	0.00%
1-May-16	0.0608	0.0609	0.0609	0.0606	-0.16%
29-Apr-16	0.0609	0.0599	0.0609	0.0599	1.67%
28-Apr-16	0.0599	0.0582	0.0601	0.0581	2.92%
27-Apr-16	0.0582	0.0584	0.0585	0.058	-0.34%
26-Apr-16	0.0584	0.0584	0.0587	0.0582	0.00%
25-Apr-16	0.0584	0.0583	0.0586	0.0583	0.17%
24-Apr-16	0.0583	0.0582	0.0583	0.0582	0.17%
22-Apr-16	0.0582	0.0592	0.0593	0.0581	-1.69%
21-Apr-16	0.0592	0.0589	0.0593	0.0589	0.51%
20-Apr-16	0.0589	0.0591	0.0594	0.0589	-0.34%
19-Apr-16	0.0591	0.0594	0.0595	0.059	-0.51%
18-Apr-16	0.0594	0.0599	0.06	0.0593	-0.83%
17-Apr-16	0.0599	0.0597	0.0599	0.0597	0.50%
15-Apr-16	0.0596	0.0593	0.0596	0.0591	0.51%
14-Apr-16	0.0593	0.0592	0.0595	0.0592	0.17%
13-Apr-16	0.0592	0.0595	0.0596	0.0591	-0.50%
12-Apr-16	0.0595	0.0598	0.0599	0.0594	-0.50%
11-Apr-16	0.0598	0.0597	0.06	0.0596	0.17%
10-Apr-16	0.0597	0.0598	0.0598	0.0597	-0.17%
8-Apr-16	0.0598	0.0597	0.0598	0.0594	0.17%
7-Apr-16	0.0597	0.0591	0.06	0.059	1.02%
6-Apr-16	0.0591	0.0587	0.0592	0.0586	0.68%
5-Apr-16	0.0587	0.0582	0.0589	0.0582	0.86%
4-Apr-16	0.0582	0.058	0.0584	0.0578	0.34%
3-Apr-16	0.058	0.058	0.0581	0.058	0.00%
1-Apr-16	0.058	0.0573	0.0581	0.0573	1.22%
31-Mar-16	0.0573	0.0575	0.0576	0.0573	-0.35%
30-Mar-16	0.0575	0.0577	0.0579	0.0574	-0.35%
29-Mar-16	0.0577	0.0574	0.0578	0.0571	0.52%
28-Mar-16	0.0574	0.0575	0.0575	0.0572	-0.17%
27-Mar-16	0.0575	0.0576	0.0576	0.0575	0.00%
25-Mar-16	0.0575	0.0578	0.0578	0.0575	-0.52%
24-Mar-16	0.0578	0.0579	0.058	0.0576	-0.17%
23-Mar-16	0.0579	0.0578	0.058	0.0576	0.17%
22-Mar-16	0.0578	0.0578	0.0583	0.0577	0.00%
21-Mar-16	0.0578	0.058	0.0582	0.0578	-0.34%
20-Mar-16	0.058	0.058	0.0581	0.058	0.00%
18-Mar-16	0.058	0.0582	0.0584	0.0579	-0.34%
17-Mar-16	0.0582	0.0578	0.0586	0.0576	0.69%
16-Mar-16	0.0578	0.0576	0.0581	0.0571	0.35%
15-Mar-16	0.0576	0.0571	0.0578	0.057	0.88%
14-Mar-16	0.0571	0.0567	0.0572	0.0567	0.71%
13-Mar-16	0.0567	0.0568	0.0568	0.0567	-0.70%
11-Mar-16	0.0571	0.0577	0.0577	0.057	-1.04%
10-Mar-16	0.0577	0.0575	0.0578	0.057	0.35%
9-Mar-16	0.0575	0.0577	0.058	0.0574	-0.35%
8-Mar-16	0.0577	0.0575	0.0578	0.0574	0.35%
7-Mar-16	0.0575	0.0573	0.0576	0.0572	0.35%
6-Mar-16	0.0573	0.0573	0.0573	0.0572	0.17%
4-Mar-16	0.0572	0.0575	0.0576	0.057	-0.52%
3-Mar-16	0.0575	0.0577	0.0577	0.0572	-0.35%
2-Mar-16	0.0577	0.0575	0.0578	0.0572	0.35%
1-Mar-16	0.0575	0.0583	0.0584	0.0574	-1.37%
29-Feb-16	0.0583	0.058	0.0584	0.0579	0.52%
28-Feb-16	0.058	0.0579	0.0581	0.0579	1.05%
26-Feb-16	0.0574	0.0577	0.058	0.0574	-0.52%
25-Feb-16	0.0577	0.0583	0.0583	0.0577	-1.03%
24-Feb-16	0.0583	0.0583	0.0588	0.0579	0.00%
23-Feb-16	0.0583	0.0577	0.0584	0.0577	1.04%
22-Feb-16	0.0577	0.058	0.058	0.0575	-0.52%
21-Feb-16	0.058	0.058	0.058	0.058	0.17%
19-Feb-16	0.0579	0.0575	0.0581	0.0575	0.70%
18-Feb-16	0.0575	0.0572	0.0576	0.0571	0.52%
17-Feb-16	0.0572	0.0571	0.0575	0.057	0.18%
16-Feb-16	0.0571	0.0568	0.0573	0.0566	0.53%
15-Feb-16	0.0568	0.0577	0.0579	0.0566	-1.56%
14-Feb-16	0.0577	0.0578	0.0578	0.0577	-0.69%
12-Feb-16	0.0581	0.0584	0.0588	0.0579	-0.51%
11-Feb-16	0.0584	0.058	0.0592	0.058	0.69%
10-Feb-16	0.058	0.057	0.0581	0.057	1.75%
9-Feb-16	0.057	0.0568	0.0575	0.0564	0.35%
8-Feb-16	0.0568	0.0563	0.0571	0.0559	0.89%
7-Feb-16	0.0563	0.0564	0.0564	0.0563	0.00%
5-Feb-16	0.0563	0.0562	0.0564	0.056	0.18%
4-Feb-16	0.0562	0.0556	0.0563	0.0556	1.08%
3-Feb-16	0.0556	0.0549	0.0562	0.0548	1.28%
2-Feb-16	0.0549	0.0544	0.055	0.0544	0.92%
1-Feb-16	0.0544	0.0544	0.0545	0.054	0.00%
31-Jan-16	0.0544	0.0544	0.0545	0.0544	0.18%
29-Jan-16	0.0543	0.0553	0.0555	0.054	-1.81%
28-Jan-16	0.0553	0.0555	0.0555	0.055	-0.36%
27-Jan-16	0.0555	0.0556	0.0557	0.0551	-0.18%
26-Jan-16	0.0556	0.0556	0.0559	0.0551	0.00%
25-Jan-16	0.0556	0.0555	0.0557	0.0552	0.18%
24-Jan-16	0.0555	0.0555	0.0555	0.0554	0.18%
22-Jan-16	0.0554	0.0558	0.056	0.0553	-0.72%
21-Jan-16	0.0558	0.0562	0.0565	0.0558	-0.71%
20-Jan-16	0.0562	0.0559	0.0568	0.0559	0.54%
19-Jan-16	0.0559	0.056	0.0561	0.0555	-0.18%
18-Jan-16	0.056	0.056	0.0562	0.0559	0.00%
17-Jan-16	0.056	0.0561	0.0561	0.056	-0.36%
15-Jan-16	0.0562	0.0557	0.0565	0.0557	0.90%
14-Jan-16	0.0557	0.0561	0.0561	0.0557	-0.36%
13-Jan-16	0.0559	0.0558	0.0559	0.0555	0.18%
12-Jan-16	0.0558	0.0558	0.0561	0.0557	0.00%
11-Jan-16	0.0558	0.0557	0.0564	0.0556	0.18%
10-Jan-16	0.0557	0.0558	0.0559	0.0556	-1.07%
8-Jan-16	0.0563	0.0561	0.0563	0.0554	0.36%
7-Jan-16	0.0561	0.0553	0.0562	0.0552	1.45%
6-Jan-16	0.0553	0.0548	0.0555	0.0548	0.91%
5-Jan-16	0.0548	0.0547	0.0549	0.0545	0.18%
4-Jan-16	0.0547	0.0542	0.055	0.0541	0.92%
3-Jan-16	0.0542	0.0541	0.0542	0.0541	0.00%
1-Jan-16	0.0542	0.0541	0.0542	0.0541	0.18%
31-Dec-15	0.0541	0.0539	0.0541	0.0538	0.37%
30-Dec-15	0.0539	0.0538	0.0539	0.0538	0.19%
29-Dec-15	0.0538	0.0539	0.0541	0.0538	-0.19%
28-Dec-15	0.0539	0.0538	0.054	0.0536	0.19%
27-Dec-15	0.0538	0.0538	0.0538	0.0537	0.19%
25-Dec-15	0.0537	0.0538	0.0539	0.0537	-0.19%
24-Dec-15	0.0538	0.0535	0.0539	0.0535	0.56%
23-Dec-15	0.0535	0.0535	0.0537	0.0535	0.00%
22-Dec-15	0.0535	0.0535	0.0537	0.0534	0.00%
21-Dec-15	0.0535	0.0534	0.0536	0.0532	0.19%
20-Dec-15	0.0534	0.0535	0.0535	0.0534	-0.19%
18-Dec-15	0.0535	0.0529	0.0536	0.0526	1.13%
17-Dec-15	0.0529	0.0529	0.053	0.0528	0.00%
16-Dec-15	0.0529	0.0531	0.0533	0.0528	-0.38%
15-Dec-15	0.0531	0.0533	0.0536	0.053	-0.38%
14-Dec-15	0.0533	0.0532	0.0537	0.0531	0.19%
13-Dec-15	0.0532	0.0531	0.0533	0.0531	-0.37%
11-Dec-15	0.0534	0.0529	0.0535	0.0527	0.95%
10-Dec-15	0.0529	0.0528	0.0531	0.0528	0.19%
9-Dec-15	0.0528	0.0522	0.0531	0.0521	1.15%
8-Dec-15	0.0522	0.052	0.0523	0.052	0.38%
7-Dec-15	0.052	0.0518	0.052	0.0517	0.39%
6-Dec-15	0.0518	0.0519	0.0519	0.0518	-0.38%
4-Dec-15	0.052	0.0522	0.0522	0.0519	-0.38%
3-Dec-15	0.0522	0.0519	0.0523	0.0503	0.58%
2-Dec-15	0.0519	0.0521	0.0521	0.0517	-0.38%
1-Dec-15	0.0521	0.0519	0.0522	0.0519	0.39%
30-Nov-15	0.0519	0.052	0.0521	0.0519	-0.19%
29-Nov-15	0.052	0.052	0.052	0.052	-0.19%
27-Nov-15	0.0521	0.0521	0.0523	0.052	0.00%
26-Nov-15	0.0521	0.0521	0.0522	0.0521	0.00%
25-Nov-15	0.0521	0.0522	0.0523	0.0519	-0.19%
24-Nov-15	0.0522	0.052	0.0522	0.0519	0.38%
23-Nov-15	0.052	0.0521	0.0522	0.0518	-0.19%
22-Nov-15	0.0521	0.0521	0.0521	0.0521	0.19%
20-Nov-15	0.052	0.0519	0.0521	0.0518	0.19%
19-Nov-15	0.0519	0.0517	0.0521	0.0516	0.39%
18-Nov-15	0.0517	0.0517	0.0518	0.0516	0.00%
17-Nov-15	0.0517	0.0517	0.0518	0.0516	0.00%
16-Nov-15	0.0517	0.0525	0.0525	0.0517	-1.52%
15-Nov-15	0.0525	0.0523	0.0525	0.0522	0.96%
13-Nov-15	0.052	0.052	0.052	0.0518	0.00%
12-Nov-15	0.052	0.0519	0.052	0.0514	0.19%
11-Nov-15	0.0519	0.0517	0.0519	0.0516	0.39%
10-Nov-15	0.0517	0.0517	0.0518	0.0515	0.00%
9-Nov-15	0.0517	0.0516	0.052	0.0514	0.19%
8-Nov-15	0.0516	0.0516	0.0516	0.0515	0.00%
6-Nov-15	0.0516	0.0521	0.0524	0.0515	-0.96%
5-Nov-15	0.0521	0.0521	0.0523	0.052	0.00%
4-Nov-15	0.0521	0.0523	0.0524	0.0521	-0.38%
3-Nov-15	0.0523	0.0525	0.0526	0.0523	-0.38%
2-Nov-15	0.0525	0.0524	0.0527	0.0523	0.19%
1-Nov-15	0.0524	0.0524	0.0524	0.0523	0.00%
30-Oct-15	0.0524	0.0525	0.0527	0.0522	-0.19%
29-Oct-15	0.0525	0.0526	0.0527	0.0524	-0.19%
28-Oct-15	0.0526	0.0527	0.0529	0.0524	-0.19%
27-Oct-15	0.0527	0.0525	0.0529	0.0524	0.38%
26-Oct-15	0.0525	0.0523	0.0526	0.0523	0.38%
25-Oct-15	0.0523	0.0524	0.0524	0.0523	0.00%
23-Oct-15	0.0523	0.0526	0.0529	0.0522	-0.57%
22-Oct-15	0.0526	0.053	0.0531	0.0526	-0.75%
21-Oct-15	0.053	0.053	0.053	0.0528	0.00%
20-Oct-15	0.053	0.0532	0.0533	0.0529	-0.38%
19-Oct-15	0.0532	0.0532	0.0534	0.053	0.00%
18-Oct-15	0.0532	0.0531	0.0532	0.0531	0.00%
16-Oct-15	0.0532	0.0533	0.0534	0.0531	-0.19%
15-Oct-15	0.0533	0.0534	0.0537	0.0532	-0.19%
14-Oct-15	0.0534	0.053	0.0535	0.0529	0.75%
13-Oct-15	0.053	0.0527	0.0531	0.0527	0.57%
12-Oct-15	0.0527	0.0528	0.0528	0.0526	-0.19%
11-Oct-15	0.0528	0.0528	0.0528	0.0527	0.00%
9-Oct-15	0.0528	0.053	0.053	0.0527	-0.38%
8-Oct-15	0.053	0.053	0.0531	0.0529	0.00%
7-Oct-15	0.053	0.0529	0.0531	0.0528	0.19%
6-Oct-15	0.0529	0.0528	0.0529	0.0527	0.19%
5-Oct-15	0.0528	0.0529	0.053	0.0527	-0.19%
4-Oct-15	0.0529	0.0529	0.053	0.0529	-0.19%
2-Oct-15	0.053	0.053	0.0535	0.0528	0.00%
1-Oct-15	0.053	0.053	0.0532	0.0528	0.00%
30-Sep-15	0.053	0.0531	0.0532	0.0528	-0.19%
29-Sep-15	0.0531	0.0531	0.0534	0.053	0.00%
28-Sep-15	0.0531	0.0529	0.0532	0.0528	0.38%
27-Sep-15	0.0529	0.0529	0.053	0.0529	0.00%
25-Sep-15	0.0529	0.0531	0.0531	0.0526	-0.38%
24-Sep-15	0.0531	0.0531	0.0535	0.0529	0.00%
23-Sep-15	0.0531	0.0531	0.0534	0.053	0.00%
22-Sep-15	0.0531	0.0529	0.0533	0.0528	0.38%
21-Sep-15	0.0529	0.0531	0.0531	0.0528	-0.38%
20-Sep-15	0.0531	0.0531	0.0531	0.053	0.00%
18-Sep-15	0.0531	0.053	0.0534	0.0529	0.19%
17-Sep-15	0.053	0.0528	0.0532	0.0526	0.38%
16-Sep-15	0.0528	0.0529	0.053	0.0528	-0.19%
15-Sep-15	0.0529	0.0529	0.0534	0.0528	0.00%
14-Sep-15	0.0529	0.0528	0.0532	0.0526	0.19%
13-Sep-15	0.0528	0.0529	0.0529	0.0528	-0.19%
11-Sep-15	0.0529	0.0529	0.053	0.0527	0.00%
10-Sep-15	0.0529	0.053	0.0532	0.0526	-0.19%
9-Sep-15	0.053	0.053	0.053	0.0526	0.00%
8-Sep-15	0.053	0.0533	0.0536	0.053	-0.56%
7-Sep-15	0.0533	0.0533	0.0534	0.0532	0.00%
6-Sep-15	0.0533	0.0534	0.0534	0.0533	-0.19%
4-Sep-15	0.0534	0.0529	0.0535	0.0529	0.95%
3-Sep-15	0.0529	0.0527	0.0531	0.0526	0.38%
2-Sep-15	0.0527	0.0532	0.0532	0.0527	-0.94%
1-Sep-15	0.0532	0.0527	0.0534	0.0527	0.95%
31-Aug-15	0.0527	0.0526	0.0527	0.0524	0.19%
30-Aug-15	0.0526	0.0526	0.0527	0.0526	0.00%
28-Aug-15	0.0526	0.053	0.053	0.0526	-0.75%
27-Aug-15	0.053	0.0534	0.0535	0.0528	-0.75%
26-Aug-15	0.0534	0.0541	0.0541	0.0533	-1.29%
25-Aug-15	0.0541	0.0539	0.0541	0.0533	0.37%
24-Aug-15	0.0539	0.0525	0.0547	0.0521	2.67%
23-Aug-15	0.0525	0.0524	0.0526	0.0524	0.38%
21-Aug-15	0.0523	0.0518	0.0524	0.0517	0.97%
20-Aug-15	0.0518	0.0516	0.0518	0.0515	0.39%
19-Aug-15	0.0516	0.0514	0.0517	0.0514	0.39%
18-Aug-15	0.0514	0.0514	0.0515	0.0513	0.00%
17-Aug-15	0.0514	0.0515	0.0515	0.0513	-0.19%
16-Aug-15	0.0515	0.0514	0.0515	0.0514	0.19%
14-Aug-15	0.0514	0.0514	0.0518	0.0513	0.00%
13-Aug-15	0.0514	0.0514	0.0518	0.0513	0.00%
12-Aug-15	0.0514	0.0506	0.0518	0.0505	1.58%
11-Aug-15	0.0506	0.0498	0.0507	0.0497	1.61%
10-Aug-15	0.0498	0.05	0.05	0.0498	-0.40%
9-Aug-15	0.05	0.05	0.05	0.0499	0.00%
7-Aug-15	0.05	0.0498	0.0501	0.0497	0.40%
6-Aug-15	0.0498	0.0498	0.0499	0.0497	0.00%
5-Aug-15	0.0498	0.05	0.0501	0.0492	-0.40%
4-Aug-15	0.05	0.0501	0.0501	0.0499	-0.20%
3-Aug-15	0.0501	0.0501	0.0501	0.0499	0.00%
2-Aug-15	0.0501	0.0502	0.0502	0.0501	0.00%
31-Jul-15	0.0501	0.05	0.0503	0.0499	0.20%
30-Jul-15	0.05	0.0501	0.0501	0.0499	-0.20%
29-Jul-15	0.0501	0.0502	0.0504	0.05	-0.20%
28-Jul-15	0.0502	0.0504	0.0505	0.0501	-0.40%
27-Jul-15	0.0504	0.0502	0.0505	0.0501	0.40%
26-Jul-15	0.0502	0.0502	0.0502	0.0501	0.20%
24-Jul-15	0.0501	0.0501	0.0503	0.05	0.00%
23-Jul-15	0.0501	0.0501	0.0503	0.05	0.00%
22-Jul-15	0.0501	0.0501	0.0502	0.05	0.00%
21-Jul-15	0.0501	0.05	0.0502	0.0499	0.20%
20-Jul-15	0.05	0.05	0.0501	0.0495	0.00%
19-Jul-15	0.05	0.0501	0.0501	0.05	-0.20%
17-Jul-15	0.0501	0.05	0.0501	0.05	0.20%
16-Jul-15	0.05	0.0501	0.0502	0.05	-0.20%
15-Jul-15	0.0501	0.0503	0.0504	0.05	-0.40%
14-Jul-15	0.0503	0.0502	0.0505	0.0502	0.20%
13-Jul-15	0.0502	0.0508	0.0509	0.0501	-1.18%
12-Jul-15	0.0508	0.0511	0.0511	0.0507	0.40%
10-Jul-15	0.0506	0.051	0.0511	0.0505	-0.78%
9-Jul-15	0.051	0.0514	0.0515	0.051	-0.78%
8-Jul-15	0.0514	0.0507	0.0516	0.0507	1.38%
7-Jul-15	0.0507	0.0506	0.0509	0.0505	0.20%
6-Jul-15	0.0506	0.0512	0.0512	0.0505	-1.17%
5-Jul-15	0.0512	0.0515	0.0515	0.0511	1.19%
3-Jul-15	0.0506	0.0504	0.0507	0.0504	0.40%
2-Jul-15	0.0504	0.0503	0.0505	0.0502	0.20%
1-Jul-15	0.0503	0.0507	0.0507	0.0503	-0.79%
30-Jun-15	0.0507	0.0506	0.0508	0.0506	0.20%
29-Jun-15	0.0506	0.0515	0.0515	0.0504	-1.75%
28-Jun-15	0.0515	0.0513	0.0518	0.0513	2.59%
26-Jun-15	0.0502	0.0503	0.0505	0.05	-0.20%
25-Jun-15	0.0503	0.0501	0.0503	0.0501	0.40%
24-Jun-15	0.0501	0.0501	0.0502	0.0499	0.00%
23-Jun-15	0.0501	0.0503	0.0503	0.05	-0.40%
22-Jun-15	0.0503	0.0505	0.0506	0.0502	-0.40%
21-Jun-15	0.0505	0.0504	0.0505	0.0504	-0.20%
19-Jun-15	0.0506	0.0505	0.0507	0.0504	0.20%
18-Jun-15	0.0505	0.0503	0.0507	0.0503	0.40%
17-Jun-15	0.0503	0.0503	0.0505	0.0499	0.00%
16-Jun-15	0.0503	0.0503	0.0504	0.0502	0.00%
15-Jun-15	0.0503	0.0505	0.0506	0.0502	-0.59%
14-Jun-15	0.0506	0.0506	0.0506	0.0505	0.60%
12-Jun-15	0.0503	0.0502	0.0504	0.0501	0.20%
11-Jun-15	0.0502	0.0505	0.0505	0.0501	-0.59%
10-Jun-15	0.0505	0.0499	0.0506	0.0498	1.20%
9-Jun-15	0.0499	0.0498	0.0501	0.0498	0.20%
8-Jun-15	0.0498	0.0494	0.0499	0.0492	0.81%
7-Jun-15	0.0494	0.0495	0.0495	0.0494	0.00%
5-Jun-15	0.0494	0.0498	0.0499	0.0493	-0.80%
4-Jun-15	0.0498	0.0499	0.0501	0.0497	-0.20%
3-Jun-15	0.0499	0.05	0.0501	0.0497	-0.20%
2-Jun-15	0.05	0.0497	0.0501	0.0499	0.60%
1-Jun-15	0.0497	0.05	0.0502	0.0496	-0.80%
31-May-15	0.0501	0.05	0.0501	0.05	0.40%
29-May-15	0.0499	0.0501	0.0502	0.0499	-0.40%
28-May-15	0.0501	0.0501	0.0502	0.0498	0.00%
27-May-15	0.0501	0.0504	0.0505	0.05	-0.60%
26-May-15	0.0504	0.051	0.051	0.0503	-1.18%
25-May-15	0.051	0.0511	0.0512	0.0509	-0.20%
24-May-15	0.0511	0.0511	0.0512	0.051	0.20%
22-May-15	0.051	0.0512	0.0514	0.0509	-0.39%
21-May-15	0.0512	0.0511	0.0513	0.0511	0.20%
20-May-15	0.0511	0.0515	0.0515	0.0511	-0.78%
19-May-15	0.0515	0.0517	0.0518	0.0514	-0.39%
18-May-15	0.0517	0.052	0.052	0.0517	-0.58%
17-May-15	0.052	0.052	0.052	0.052	0.00%
15-May-15	0.052	0.052	0.0521	0.0517	0.00%
14-May-15	0.052	0.052	0.0522	0.052	0.00%
13-May-15	0.052	0.0518	0.0521	0.0517	0.39%
12-May-15	0.0518	0.0517	0.0519	0.0516	0.19%
11-May-15	0.0517	0.0519	0.0521	0.0517	-0.39%
10-May-15	0.0519	0.0519	0.0519	0.0518	0.19%
8-May-15	0.0518	0.0519	0.0519	0.0516	-0.19%
7-May-15	0.0519	0.0519	0.0522	0.0517	0.00%
6-May-15	0.0519	0.0517	0.052	0.0517	0.39%
5-May-15	0.0517	0.0517	0.0519	0.0515	0.00%
4-May-15	0.0517	0.0518	0.0518	0.0516	-0.19%
3-May-15	0.0518	0.0517	0.0518	0.0517	0.19%
1-May-15	0.0517	0.0519	0.0519	0.0514	-0.39%
30-Apr-15	0.0519	0.0521	0.0524	0.0517	-0.38%
29-Apr-15	0.0521	0.0522	0.0523	0.0519	-0.19%
28-Apr-15	0.0522	0.0522	0.0522	0.0521	0.00%
27-Apr-15	0.0522	0.0521	0.0523	0.052	0.19%
26-Apr-15	0.0521	0.0522	0.0522	0.0521	0.00%
24-Apr-15	0.0521	0.0518	0.0521	0.0518	0.58%
23-Apr-15	0.0518	0.0516	0.0519	0.0516	0.39%
22-Apr-15	0.0516	0.0518	0.0519	0.0516	-0.39%
21-Apr-15	0.0518	0.052	0.052	0.0518	-0.38%
20-Apr-15	0.052	0.0521	0.0524	0.0519	-0.19%
19-Apr-15	0.0521	0.052	0.0522	0.052	0.00%
17-Apr-15	0.0521	0.052	0.0523	0.052	0.19%
16-Apr-15	0.052	0.0521	0.0522	0.0519	-0.19%
15-Apr-15	0.0521	0.052	0.0523	0.0518	0.19%
14-Apr-15	0.052	0.0518	0.0522	0.0518	0.39%
13-Apr-15	0.0518	0.0516	0.0518	0.0509	0.39%
12-Apr-15	0.0516	0.0517	0.0517	0.0516	-0.19%
10-Apr-15	0.0517	0.0515	0.0517	0.0513	0.39%
9-Apr-15	0.0515	0.0517	0.0518	0.0514	-0.39%
8-Apr-15	0.0517	0.0515	0.0518	0.0515	0.39%
7-Apr-15	0.0515	0.0516	0.0518	0.0514	-0.19%
6-Apr-15	0.0516	0.0516	0.0517	0.0514	0.00%
5-Apr-15	0.0516	0.0516	0.0516	0.0515	-0.19%
3-Apr-15	0.0517	0.0518	0.0519	0.0515	-0.19%
2-Apr-15	0.0518	0.0518	0.0519	0.0517	0.00%
1-Apr-15	0.0518	0.0517	0.0519	0.0515	0.19%
31-Mar-15	0.0517	0.0517	0.0518	0.0515	0.00%
30-Mar-15	0.0517	0.0521	0.0523	0.0516	-0.77%
29-Mar-15	0.0521	0.0521	0.0522	0.0521	-0.19%
27-Mar-15	0.0522	0.0521	0.0523	0.052	0.19%
26-Mar-15	0.0521	0.052	0.0525	0.052	0.19%
25-Mar-15	0.052	0.0518	0.0521	0.0518	0.39%
24-Mar-15	0.0518	0.0519	0.0521	0.0517	-0.19%
23-Mar-15	0.0519	0.0517	0.052	0.0517	0.39%
22-Mar-15	0.0517	0.0517	0.0517	0.0515	0.00%
20-Mar-15	0.0517	0.0513	0.0518	0.0512	0.78%
19-Mar-15	0.0513	0.0519	0.0521	0.0512	-1.16%
18-Mar-15	0.0519	0.0515	0.0522	0.0513	0.78%
17-Mar-15	0.0515	0.0516	0.0516	0.0514	-0.19%
16-Mar-15	0.0516	0.0517	0.0517	0.051	-0.19%
15-Mar-15	0.0517	0.0517	0.0517	0.0515	0.19%
13-Mar-15	0.0516	0.0516	0.0517	0.0515	0.00%
12-Mar-15	0.0516	0.0516	0.0519	0.0515	0.00%
11-Mar-15	0.0516	0.0518	0.0518	0.0515	-0.39%
10-Mar-15	0.0518	0.0516	0.0518	0.0513	0.39%
9-Mar-15	0.0516	0.0519	0.0519	0.0515	-0.58%
8-Mar-15	0.0519	0.0519	0.052	0.0519	0.00%
6-Mar-15	0.0519	0.0522	0.0523	0.0516	-0.57%
5-Mar-15	0.0522	0.0524	0.0524	0.0521	-0.38%
4-Mar-15	0.0524	0.0524	0.0525	0.0523	0.00%
3-Mar-15	0.0524	0.0522	0.0525	0.0522	0.38%
2-Mar-15	0.0522	0.0525	0.0525	0.0522	-0.57%
1-Mar-15	0.0525	0.0524	0.0525	0.0524	0.19%
27-Feb-15	0.0524	0.0524	0.0526	0.0523	0.00%
26-Feb-15	0.0524	0.0527	0.0528	0.0524	-0.57%
25-Feb-15	0.0527	0.0526	0.0528	0.0525	0.19%
24-Feb-15	0.0526	0.0526	0.0527	0.0523	0.00%
23-Feb-15	0.0526	0.0525	0.0527	0.0524	0.19%
22-Feb-15	0.0525	0.0524	0.0525	0.0524	0.00%
20-Feb-15	0.0525	0.0526	0.0529	0.0525	-0.19%
19-Feb-15	0.0526	0.0527	0.0528	0.0525	-0.19%
18-Feb-15	0.0527	0.0525	0.0528	0.0524	0.38%
17-Feb-15	0.0525	0.0527	0.0529	0.0524	-0.38%
16-Feb-15	0.0527	0.0525	0.0528	0.0524	0.19%
15-Feb-15	0.0526	0.0526	0.0526	0.0525	0.19%
13-Feb-15	0.0525	0.0525	0.0527	0.0523	0.00%
12-Feb-15	0.0525	0.052	0.0527	0.0519	0.96%
11-Feb-15	0.052	0.0523	0.0523	0.0518	-0.57%
10-Feb-15	0.0523	0.0527	0.0528	0.0522	-0.76%
9-Feb-15	0.0527	0.0525	0.0528	0.0524	0.38%
8-Feb-15	0.0525	0.0526	0.0526	0.0524	0.19%
6-Feb-15	0.0524	0.0532	0.0533	0.0523	-1.50%
5-Feb-15	0.0532	0.0533	0.0535	0.0531	-0.19%
4-Feb-15	0.0533	0.0532	0.0534	0.0529	0.19%
3-Feb-15	0.0532	0.0533	0.0535	0.0531	-0.19%
2-Feb-15	0.0533	0.0532	0.0535	0.0523	0.19%
1-Feb-15	0.0532	0.0533	0.0533	0.0532	0.00%
30-Jan-15	0.0532	0.0528	0.0533	0.0528	0.76%
29-Jan-15	0.0528	0.0531	0.0531	0.0527	-0.56%
28-Jan-15	0.0531	0.053	0.0533	0.0528	0.19%
27-Jan-15	0.053	0.0528	0.0532	0.0527	0.38%
26-Jan-15	0.0528	0.0533	0.0533	0.0527	-1.31%
25-Jan-15	0.0535	0.0533	0.0536	0.0532	1.13%
23-Jan-15	0.0529	0.0523	0.053	0.0523	1.15%
22-Jan-15	0.0523	0.0527	0.0529	0.0522	-0.76%
21-Jan-15	0.0527	0.0524	0.053	0.0521	0.57%
20-Jan-15	0.0524	0.0528	0.0528	0.0523	-0.76%
19-Jan-15	0.0528	0.0528	0.0531	0.0528	0.00%
18-Jan-15	0.0528	0.0529	0.0529	0.0528	0.00%
16-Jan-15	0.0528	0.0532	0.0535	0.0527	-0.75%
15-Jan-15	0.0532	0.0528	0.0534	0.0525	0.76%
14-Jan-15	0.0528	0.0526	0.0534	0.0525	0.38%
13-Jan-15	0.0526	0.0524	0.0527	0.0522	0.38%
12-Jan-15	0.0524	0.0524	0.0525	0.052	0.00%
11-Jan-15	0.0524	0.0524	0.0524	0.0523	0.19%
9-Jan-15	0.0523	0.0519	0.0524	0.0518	0.77%
[truncated: 1,255 more rows]
